# Supplementary material
Source: ML conference proceedings conference paper supplement (https://proceedings.neurips.cc/paper_files/paper/2020/hash/187acf7982f3c169b3075132380986e4-Abstract.html)
Supplement: Supplementary file [file 187acf7982f3c169b3075132380986e4-Supplemental.zip]

---

# Lower Bounds and Optimal Algorithms for Personalized Federated Learning

---

**Filip Hanzely**  
KAUST  
Thuwal, Saudi Arabia  
filip.hanzely@kaust.edu.sa

**Slavomír Hanzely**  
KAUST  
Thuwal, Saudi Arabia  
slavomir.hanzely@kaust.edu.sa

**Samuel Horváth**  
KAUST  
Thuwal, Saudi Arabia  
samuel.horvath@kaust.edu.sa

**Peter Richtárik**  
KAUST  
Thuwal, Saudi Arabia  
peter.richtarik@kaust.edu.sa

## Abstract

In this work, we consider the optimization formulation of personalized federated learning recently introduced by [19] which was shown to give an alternative explanation to the workings of local SGD methods. Our first contribution is establishing the first lower bounds for this formulation, for both the communication complexity and the local oracle complexity. Our second contribution is the design of several optimal methods matching these lower bounds in almost all regimes. These are the first provably optimal methods for personalized federated learning. Our optimal methods include an accelerated variant of FedProx, and an accelerated variance-reduced version of FedAvg/Local SGD. We demonstrate the practical superiority of our methods through extensive numerical experiments.

## 1 Introduction

Federated Learning (FL) [32, 24] is a relatively new field attracting much attention lately. Specifically, FL is a subfield of distributed machine learning that aims to fit the data stored locally on a very large number of heterogeneous clients. Unlike typical distributed learning inside a data center, each FL client only sees his/her data, which might differ from the population average significantly. Furthermore, as the clients are often physically located far away from the central server, communication becomes a notable bottleneck, which is far more significant compared to centralized datacenter learning.

While the key factor differentiating FL from other varieties of supervised learning lies in the practical considerations coming from the need to train models from private and heterogeneous data stored across a large number of heterogeneous and not always available devices, FL is supervised learning, and as such shares the same mathematical formalism. In particular, the standard formulation of FL aims to find the minimizer of the overall population loss

$$\min_{z \in \mathbb{R}^d} \frac{1}{n} \sum_{i=1}^n f_i(z) = \min_{x_1, x_2, \dots, x_n \in \mathbb{R}^d} \frac{1}{n} \sum_{i=1}^n f_i(x_i), \quad (1)$$

subject to  $x_1 = x_2 = \dots = x_n$ ,

where  $f_i$  is the loss of the client  $i$  that only depends on his/her own local data.

However, the requirements of several FL applications [53, 25, 10] question the appropriateness of the objective (1) as a modeling paradigm for FL. Specifically, the minimizer of the overall population

loss might not be the ideal model for a given client given that his/her data distribution differs from the population significantly. A good example to illustrate the requirement of *personalized* FL models is next word prediction on mobile devices, where a personalized FL approach [20] significantly outperforms the standard non-personalized one.

There are multiple strategies in the literature for incorporating personalization into FL: multi-task learning [49, 48, 14], transfer learning [54, 23], variational inference [8], mixing of local and global models [41, 19, 31, 10] and others [13]. See also [25, 22] for a survey on personalized FL.

In this work, we focus on the mixing FL objective from [19], which is well-known from the area of distributed optimization [26, 16] and distributed transfer learning [30, 50]. The mentioned formulation allows the local models  $x_i$  to be mutually different, while penalizing their dissimilarity:

$$\min_{x=[x_1, \dots, x_n] \in \mathbb{R}^{nd}, \forall i: x_i \in \mathbb{R}^d} \left\{ F(x) := \underbrace{\frac{1}{n} \sum_{i=1}^n f_i(x_i)}_{:=f(x)} + \lambda \underbrace{\frac{1}{2n} \sum_{i=1}^n \|x_i - \bar{x}\|^2}_{:=\psi(x)} \right\}. \quad (2)$$

Surprisingly, the optimal solution  $x^* = [x_1^*, x_2^*, \dots, x_n^*] \in \mathbb{R}^{nd}$  of (2) can be expressed as  $x_i^* = \bar{x}^* - \frac{1}{\lambda} \nabla f_i(x_i^*)$ , where  $\bar{x}^* = \frac{1}{n} \sum_{i=1}^n x_i^*$  [19], which strongly resembles the influential model-agnostic meta learning (MAML) framework from [15].

Specifically, it was shown that a simple version of Stochastic Gradient Descent (SGD) applied on (2) is essentially<sup>1</sup> equivalent to FedAvg algorithm [19]. Furthermore, the FL formulation (2) enabled local gradient methods to outperform their non-local cousins when applied to heterogeneous data problems.<sup>2</sup>

## 2 Contributions

In this paper, we study the personalized FL formulation (2). We propose lower complexity bounds for communication and local computation, and develop several algorithms capable of achieving them. Our contributions can be summarized as follows:

- We propose a *lower bound on the communication complexity* of the federated learning formulation (2). We show that for any algorithm that satisfies a certain reasonable assumption (see As. 3.1) there is an instance of (2) with  $L$ -smooth,  $\mu$ -strongly convex<sup>3</sup> local objectives  $f_i$  requiring at least  $\mathcal{O}\left(\sqrt{\frac{\min\{L, \lambda\}}{\mu}} \log \frac{1}{\varepsilon}\right)$  communication rounds to get to the  $\varepsilon$ -neighborhood of the optimum.
- We further establish a *lower complexity bound on the number of local oracle calls*. We show that one requires at least  $\mathcal{O}\left(\sqrt{\frac{\min\{L, \lambda\}}{\mu}} \log \frac{1}{\varepsilon}\right)$  proximal oracle calls<sup>4</sup> or at least  $\mathcal{O}\left(\sqrt{\frac{L}{\mu}} \log \frac{1}{\varepsilon}\right)$  evaluations of local gradients. Similarly, given that each of the local objectives is of a  $m$ -finite-sum structure with  $\tilde{L}$ -smooth summands, we show that at least  $\mathcal{O}\left(\left(m + \sqrt{\frac{m\tilde{L}}{\mu}}\right) \log \frac{1}{\varepsilon}\right)$  gradients of the local summands are required.

<sup>1</sup>Up to the stepsize and random number of the local gradient steps.

<sup>2</sup>Surprisingly enough, the non-local algorithms outperform their local counterparts when applied to solve the classical FL formulation (1) with heterogeneous data.

<sup>3</sup>We say that function  $h : \mathbb{R}^d \rightarrow \mathbb{R}$  is  $L$ -smooth if for each  $z, z' \in \mathbb{R}^d$  we have  $h(z) \leq h(z') + \langle \nabla h(z), z' - z \rangle + \frac{L}{2} \|z - z'\|^2$ . Similarly, a function  $h : \mathbb{R}^d \rightarrow \mathbb{R}$  is  $\mu$ -strongly convex, if for each  $z, z' \in \mathbb{R}^d$  it holds  $h(z) \geq h(z') + \langle \nabla h(z), z' - z \rangle + \frac{\mu}{2} \|z - z'\|^2$ .

<sup>4</sup>Local proximal oracle reveals  $\{\text{prox}_{\beta f}(x), \nabla f(x)\}$  for any  $x \in \mathbb{R}^{nd}, \beta > 0$ . Local gradient oracle reveals  $\{\nabla f(x)\}$  for any  $x \in \mathbb{R}^{nd}$ .

| Algorithm                        | Local oracle | Optimal # comm           | Optimal # local                   |
|----------------------------------|--------------|--------------------------|-----------------------------------|
| L2GD [19]                        | Grad         | ✗                        | ✗                                 |
| L2SGD+ [19]                      | Stoch grad   | ✗                        | ✗                                 |
| APGD1 [50] (A. 2)                | Prox         | ✓ (if $\lambda \leq L$ ) | ✓ (if $\lambda \leq L$ )          |
| APGD2 [50] (A. 3)                | Grad         | ✓ (if $\lambda \geq L$ ) | ✓                                 |
| APGD2 [50] (A. 3)                | Stoch grad   | ✓ (if $\lambda \geq L$ ) | ✗                                 |
| IAPGD [50] (A. 1) + AGD [38]     | Grad         | ✓ (if $\lambda \leq L$ ) | ✓ (if $\lambda \leq L$ )          |
| IAPGD [50] (A. 1) + Katyusha [3] | Stoch grad   | ✓ (if $\lambda \leq L$ ) | ✓ (if $m\lambda \leq \tilde{L}$ ) |
| AL2SGD+ (A. 4)                   | Stoch grad   | ✓                        | ✓ (if $\lambda \leq \tilde{L}$ )  |

Table 1: Algorithms for solving (2) and their (optimal) complexities.

- We develop several approaches for solving (2) achieving *optimal communication complexity and optimal local gradient complexity* under various circumstances. Specializing the approach from [50] to our problem, we apply Accelerated Proximal Gradient Descent (APGD) in two different ways – we either take a gradient step with respect to  $f$  and a proximal step with respect to  $\lambda\psi$ , or vice versa. In the first case, we get communication complexity and local gradient complexity of the order  $\mathcal{O}\left(\sqrt{\frac{L}{\mu}} \log \frac{1}{\varepsilon}\right)$ , which is optimal if  $L \leq \lambda$ . In the second case, we get communication complexity and local prox complexity of the order  $\mathcal{O}\left(\sqrt{\frac{\lambda}{\mu}} \log \frac{1}{\varepsilon}\right)$ , which is optimal if  $L \geq \lambda$ . Motivated again by [50], we argue that local prox steps can be evaluated inexactly<sup>5</sup> either by running Accelerated Gradient Descent (AGD) [38] locally, or by running Katyusha [3] locally, given that the local objective is of a  $m$ -finite sum structure with  $\tilde{L}$ -smooth summands. Local AGD approach preserves  $\mathcal{O}\left(\sqrt{\frac{\lambda}{\mu}} \log \frac{1}{\varepsilon}\right)$  communication complexity and yields  $\tilde{\mathcal{O}}\left(\sqrt{\frac{L+\lambda}{\mu}}\right)$  local gradient complexity, both of them optimal for  $L \geq \lambda$  (up to log factors). Similarly, employing Katyusha locally, we obtain communication complexity of order  $\mathcal{O}\left(\sqrt{\frac{\lambda}{\mu}} \log \frac{1}{\varepsilon}\right)$  and local gradient complexity of order  $\tilde{\mathcal{O}}\left(m\sqrt{\frac{\lambda}{\mu}} + \sqrt{m\frac{\tilde{L}}{\mu}}\right)$ . The former is optimal once  $L \geq \lambda$ , while the latter is (up to log factor) optimal once  $m\lambda \leq \tilde{L}$ .
- Inexact APGD with local randomized solver has three drawbacks: (i) there are extra log factors in the local gradient complexity, (ii) boundedness of the algorithm iterates as an assumption is required, and (iii) the communication complexity is suboptimal for  $\lambda > L$ . In order to fix all the issues, we *accelerate the L2SGD+ algorithm* from [19]. The proposed algorithm, AL2SGD+, enjoys the optimal communication complexity  $\mathcal{O}\left(\sqrt{\frac{\min\{\tilde{L}, \lambda\}}{\mu}} \log \frac{1}{\varepsilon}\right)$  and the local summand gradient complexity  $\mathcal{O}\left(\left(m + \sqrt{\frac{m(\tilde{L}+\lambda)}{\mu}}\right) \log \frac{1}{\varepsilon}\right)$ , which is optimal for  $\lambda \leq \tilde{L}$ . Unfortunately, the two bounds are not achieved at the same time, as we shall see.
- As a consequence of all aforementioned points, **we show the optimality of local algorithms applied on FL problem (2) with heterogeneous data**. We believe this is an important contributions to the FL literature. Until now, local algorithms were known to be optimal only when all nodes own the same data set, which is not a realistic regime for FL applications. By showing the optimality of local methods, we partially justify standard FL practices (i.e., using local methods in the practical scenarios with non-iid data), albeit with a twist: local methods should be seen as methods for solving the personalized FL formulation (2) first introduced in [19].

Table 1 presents a summary of the described results: for each algorithm, it indicates the local oracle requirement and the circumstances under which the corresponding complexities are optimal.

<sup>5</sup>Such an approach was already considered in [28, 40] for the standard FL formulation (1).

| Local oracle | Optimal<br># Comm | Optimal<br># Local calls           | Algorithm                                                                                                                           |
|--------------|-------------------|------------------------------------|-------------------------------------------------------------------------------------------------------------------------------------|
| Proximal     | ✓                 | ✓                                  | $\begin{cases} \lambda \geq L : & \text{APGD2 [50](A. 3)} \\ \lambda \leq L : & \text{APGD1 [50](A. 2)} \end{cases}$                |
| Gradient     | ✓                 | ✓                                  | $\begin{cases} \lambda \geq L : & \text{APGD2 [50](A. 3)} \\ \lambda \leq L : & \text{IAPGD [50](A. 1) + AGD [38]} \end{cases}$     |
| Stoch grad   | ✓                 | ✓ if $m\lambda \leq \tilde{L}$     | $\begin{cases} \lambda \geq L : & \text{APGD2 [50](A. 3)} \\ \lambda \leq L : & \text{IAPGD [50](A. 1) + Katyusha [3]} \end{cases}$ |
| Stoch grad   | ✓<br>✗            | ✗<br>✓ if $\lambda \leq \tilde{L}$ | AL2SGD+ <sup>(*)</sup>                                                                                                              |

Table 2: Matching (up to log and constant factors) lower and upper complexity bounds for solving (2). Indicator ✓ means that the lower and upper bound are matching up to constant and log factors, while ✗ means the opposite. <sup>(\*)</sup> (AL2SGD+ under stochastic gradient oracle): AL2SGD+ can be optimal either in terms of the communication or in terms of the local computation; the two cases require a slightly different parameter setup.

**Optimality.** Next we present Table 2 which carries an information orthogonal to Table 1. In particular, Table 2 indicates whether our lower and upper complexities match for a given pair of {local oracle, type of complexity}. The lower and upper complexity bounds on the number of communication rounds match regardless of the local oracle. Similarly, the local oracle calls match almost always with one exception when the local oracle provides summand gradients and  $\lambda > \tilde{L}$ .

**Remark 2.1** *Our upper and lower bounds do not match for the local summand gradient oracle once we are in the classical FL setup (2), which we recover for  $\lambda = \infty$ . In such a case, an optimal algorithm was developed only very recently [21] under a slightly stronger oracle – the proximal oracle for the local summands.*

### 3 Lower complexity bounds

Before stating our lower complexity bounds for solving (2), let us formalize the notion of an oracle that an algorithm interacts with.

As we are interested in both communication and local computation, we will also distinguish between two different oracles: the *communication oracle* and the *local oracle*. While the communication oracle allows the optimization history to be shared among the clients, the local oracle  $\text{Loc}(x_i, i)$  provides either a local proximal operator, local gradient, or local gradient of a summand given that a local loss is of a finite-sum structure itself ( $f_i(x_i) = \frac{1}{m} \sum_{j=1}^m \tilde{f}_{i,j}(x_i)$ ):

$$\text{Loc}(x, i) = \begin{cases} \{\nabla f_i(x_i), \text{prox}_{\beta_i f_i}(x_i)\} & \text{if oracle is proximal (for any } \beta_i \geq 0) \\ \{\nabla f_i(x_i)\} & \text{if oracle is gradient} \\ \{\nabla \tilde{f}_{i,j_i}(x_i)\} & \text{if oracle is summand gradient (for any } 1 \leq j_i \leq m) \end{cases}$$

for all clients  $i$  simultaneously, which we refer to as a single local oracle call.

Next, we restrict ourselves to algorithms whose iterates lie in the span of previously observed oracle queries. Assumption 3.1 formalizes this.

**Assumption 3.1** *Let  $\{x^k\}_{k=1}^\infty$  be iterates generated by algorithm  $\mathcal{A}$ . For  $1 \leq i \leq n$  let  $\{S_i^k\}_{k=0}^\infty$  be a sequence of sets defined recursively as follows:*

$$\begin{aligned} S_i^0 &= \text{Span}(x_i^0) \\ S_i^{k+1} &= \begin{cases} \text{Span}(S_i^k, \text{Loc}(x^k, i)) & \text{if } \zeta(k) = 1 \\ \text{Span}(S_1^k, S_2^k, \dots, S_n^k) & \text{otherwise,} \end{cases} \end{aligned}$$

where  $\zeta(k) = 1$  if the local oracle was queried at the iteration  $k$ , otherwise  $\zeta(k) = 0$ . Then, assume that  $x_i^k \in S_i^k$ .

Assumption 3.1 is rather standard in the literature of distributed optimization [44, 21]; it informally means that the iterates of  $\mathcal{A}$  lie in the span of explored directions only. A similar restriction is in place for several standard optimization lower complexity bounds [37, 27]. We shall, however, note that Assumption 3.1 can be omitted by choosing the worst-case objective adversarially based on the algorithm decisions [36, 51, 52]. We do not explore this direction for the sake of simplicity.

### 3.1 Lower complexity bounds on the communication

We now present our lower bound on the communication complexity of problem (2).

**Theorem 3.1** *Let  $k \geq 0, L \geq \mu, \lambda \geq \mu$ . Then, there exist  $L$ -smooth  $\mu$ -strongly convex functions  $f_1, f_2, \dots, f_n : \mathbb{R}^d \rightarrow \mathbb{R}$  and a starting point  $x^0 \in \mathbb{R}^{nd}$ , such that the sequence of iterates  $\{x^t\}_{t=1}^k$  generated by any algorithm  $\mathcal{A}$  meeting Assumption 3.1 satisfies*

$$\|x^k - x^*\|^2 \geq \frac{1}{4} \left( 1 - 10 \max \left\{ \sqrt{\frac{\mu}{\lambda}}, \sqrt{\frac{\mu}{L - \mu}} \right\} \right)^{C(k)+1} \|x^0 - x^*\|^2. \quad (3)$$

Above,  $C(k)$  stands for the number of communication oracle queries at the first  $k$  iterations of  $\mathcal{A}$ .

Theorem 3.1 shows that in order get to  $\varepsilon$  close to the optimum, one needs at least  $\mathcal{O} \left( \sqrt{\frac{\min\{\lambda, L\}}{\mu}} \log \frac{1}{\varepsilon} \right)$  rounds of the communications. This reduces to known communication complexity  $\mathcal{O} \left( \sqrt{\frac{L}{\mu}} \log \frac{1}{\varepsilon} \right)$  for standard FL objective (1) from [44, 21] when  $\lambda = \infty$ .<sup>6</sup>

### 3.2 Lower complexity bounds on the local computation

Next, we present our lower complexity bounds on the number of the local oracle calls for three different types of a local oracle. In a special case when  $\lambda = \infty$ , we recover known local oracle bounds for the classical FL objective (1) from [21].

**Proximal oracle.** The construction from Theorem 3.1 not only requires  $\mathcal{O} \left( \sqrt{\frac{\min\{\lambda, L\}}{\mu}} \log \frac{1}{\varepsilon} \right)$  communication rounds to reach  $\varepsilon$ -neighborhood of the optimum, it also requires at least  $\mathcal{O} \left( \sqrt{\frac{\min\{\lambda, L\}}{\mu}} \log \frac{1}{\varepsilon} \right)$  calls of any local oracle, which serves as the lower bound on the local proximal oracle.

**Gradient oracle.** Setting  $x^0 = 0 \in \mathbb{R}^{nd}$  and  $f_1 = f_2 = \dots = f_n$ , problem (2) reduces to minimizing a single local objective  $f_1$ . Selecting next  $f_1$  as the worst-case quadratic function from [37], the corresponding objective requires at least  $\mathcal{O} \left( \sqrt{\frac{L}{\mu}} \log \frac{1}{\varepsilon} \right)$  gradient calls to reach  $\varepsilon$ -neighborhood, which serves as our lower bound. Note that parallelism does not help as the starting point is identical on all machines and the construction of  $f$  only allows to explore a single coordinate per a local call, regardless of communication.

**Summand gradient oracle.** Suppose that  $\tilde{f}_{i,j}$  is  $\tilde{L}$ -smooth for all  $1 \leq j \leq m$  and  $1 \leq i \leq n$ . Let us restrict attention on the class of client-symmetric algorithms for which  $x_i^{k+1} = \mathcal{A}(H_i^k, H_{-i}^k, C^k)$ , where  $H_i$  is history of local gradients gathered by client  $i$ ,  $H_{-i}$  is an *unordered* set with elements  $H_l$  for all  $l \neq i$  and  $C^k$  are indices of the communication rounds of the past. We assume that  $\mathcal{A}$  is either deterministic, or generated from given seed that is identical for all clients initially.<sup>7</sup> Setting again  $x^0 = 0 \in \mathbb{R}^{nd}$  and  $f_1 = f_2 = \dots = f_n$ , the described algorithm restriction yields  $x_1^k = x_2^k = \dots = x_n^k$  for all  $k \geq 0$ . Consequently, the problem reduces to minimize a single finite sum objective  $f_1$  which requires at least  $\mathcal{O} \left( m + \sqrt{\frac{m\tilde{L}}{\mu}} \log \frac{1}{\varepsilon} \right)$  summand gradient calls [27, 51].

<sup>6</sup>See also [52] for a similar lower bound in a slightly different setup.

<sup>7</sup>We suspect that assuming perfect symmetry across nodes is not necessary and can be omitted using more complex arguments. In fact, we believe that allowing for a varying scale of the local problem across the workers so that the condition number remains constant, we can adapt the approach from [21] to obtain the desired local summand gradient complexity without assuming symmetry.

## 4 Optimal algorithms

In this section, we present several algorithms that match the lower complexity bound on the number of communication rounds and the local steps obtained in Section 3.

### 4.1 Accelerated Proximal Gradient Descent (APGD) for Federated Learning

The first algorithm we mention is a version of the accelerated proximal gradient descent [6]. In order to see how the method specializes in our setup, let us first describe the non-accelerated counterpart – proximal gradient descent (PGD).

Let a function  $h : \mathbb{R}^{nd} \rightarrow \mathbb{R}$  be  $L_h$ -smooth and  $\mu_h$ -strongly convex, and function  $\phi : \mathbb{R}^{nd} \rightarrow \mathbb{R} \cup \{\infty\}$  be convex. In its most basic form, iterates of PGD to minimize a regularized convex objective  $h(x) + \phi(x)$  are generated recursively as follows

$$x^{k+1} = \text{prox}_{\frac{1}{L_h}\phi} \left( x^k - \frac{1}{L_h} \nabla h(x^k) \right) = \underset{x \in \mathbb{R}^{nd}}{\text{argmin}} \phi(x) - \frac{L_h}{2} \left\| x - \left( x^k - \frac{1}{L_h} \nabla h(x^k) \right) \right\|^2. \quad (4)$$

The iteration complexity of the above process is  $\mathcal{O} \left( \frac{L_h}{\mu_h} \log \frac{1}{\varepsilon} \right)$ .

Motivated by [50]<sup>8</sup>, there are two different ways to apply the process (4) to the problem (2). A more straightforward option is to set  $h = f$ ,  $\phi = \lambda\psi$ , which results in the following update rule

$$x_i^{k+1} = \frac{Ly_i^k + \lambda \bar{y}^k}{L + \lambda}, \quad \text{where} \quad y_i^k = x_i^k - \frac{1}{L} \nabla f(x_i^k), \quad \bar{y}^k = \frac{1}{n} \sum_{i=1}^n y_i^k, \quad (5)$$

and it yields  $\mathcal{O} \left( \frac{L}{\mu} \log \frac{1}{\varepsilon} \right)$  rate. The second option is to set  $h(x) = \lambda\psi(x) + \frac{\mu}{2n} \|x\|^2$  and  $\phi(x) = f(x) - \frac{\mu}{2n} \|x\|^2$ . Consequently, the update rule (4) becomes (see Lemma C.3 in the Appendix):

$$x_i^{k+1} = \text{prox}_{\frac{1}{\lambda}f_i}(\bar{x}^k) = \underset{z \in \mathbb{R}^d}{\text{argmin}} f_i(z) + \frac{\lambda}{2} \|z - \bar{x}^k\|^2 \quad \text{for all } i, \quad (6)$$

matching the FedProx [28] algorithm. The iteration complexity we obtain is, however,  $\mathcal{O} \left( \frac{\lambda}{\mu} \log \frac{1}{\varepsilon} \right)$  (see Lemma C.3 again).

As both (5) and (6) require a single communication round per iteration, the corresponding communication complexity becomes  $\mathcal{O} \left( \frac{L}{\mu} \log \frac{1}{\varepsilon} \right)$  and  $\mathcal{O} \left( \frac{\lambda}{\mu} \log \frac{1}{\varepsilon} \right)$  respectively, which is suboptimal in the light of Theorem 3.1.

Fortunately, incorporating the Nesterov’s momentum [38, 6] on top of the procedure (6) yields both an optimal communication complexity and optimal local prox complexity once  $\lambda \leq L$ . We will refer to such method as APGD1 (Algorithm 2 in the Appendix). Similarly, incorporating the acceleration into (5) yields both an optimal communication complexity and optimal local prox complexity once  $\lambda \geq L$ . Furthermore, such an approach yields the optimal local gradient complexity regardless of the relative comparison of  $L, \lambda$ . We refer to such method APGD2 (Algorithm 3 in the Appendix).

### 4.2 Beyond proximal oracle: Inexact APGD (IAPGD)

In most cases, the local proximal oracle is impractical as it requires the exact minimization of the regularized local problem at each iteration. In this section, we describe an accelerated inexact [45] version of (6) (Algorithm 1), which only requires a local (either full or summand) gradient oracle. We present two different approaches to achieve so: AGD [38] (under the gradient oracle) and Katyusha [3] (under the summand gradient oracle). Both strategies, however, share a common characteristic: they progressively increase the effort to inexactly evaluate the local prox, which is essential in order to preserve the optimal communication complexity.

<sup>8</sup>Iterative process (6) is in fact a special case of algorithms proposed in [50]. See Remark 4.1 for details.

---

**Algorithm 1** IAPGD +  $\mathcal{A}$ 

---

**Require:** Starting point  $y^0 = x^0 \in \mathbb{R}^{nd}$

**for**  $k = 0, 1, 2, \dots$  **do**

**Central server** computes the average  $\bar{y}^k = \frac{1}{n} \sum_{i=1}^n y_i^k$

    For all **clients**  $i = 1, \dots, n$ :

        Set  $h_i^{k+1}(z) := f_i(z) + \frac{\lambda}{2} \|z - \bar{y}^k\|^2$  and find  $x_i^{k+1}$  using local solver  $\mathcal{A}$  for  $T_k$  iterations

$$h_i^{k+1}(x_i^{k+1}) \leq \epsilon_k + \min_{z \in \mathbb{R}^d} h_i^{k+1}(z). \quad (7)$$

        For all **clients**  $i = 1, \dots, n$ : Take the momentum step  $y_i^{k+1} = x_i^{k+1} + \frac{\sqrt{\lambda} - \sqrt{\mu}}{\sqrt{\lambda} + \sqrt{\mu}} (x_i^{k+1} - x_i^k)$

**end for**

---

**Remark 4.1** As already mentioned, the idea of applying IAPGD to solve (2) is not new; it was already explored in [50].<sup>9</sup> However, [50] does not argue about the optimality of IAPGD. Less importantly, our analysis is slightly more careful, and it supports Katyusha as a local sub-solver as well.

#### IAPGD + AGD

The next theorem states the convergence rate of IAPGD with AGD [38] as a local subsolver.

**Theorem 4.2** Suppose that  $f_i$  is  $L$ -smooth and  $\mu$ -strongly convex for all  $i$ . Let AGD with starting point  $y_i^k$  be employed for  $T_k := \sqrt{\frac{L+\lambda}{\mu+\lambda}} \log \left( 1152L\lambda n^2 \left( 2\sqrt{\frac{\lambda}{\mu}} + 1 \right)^2 \mu^{-2} \right) + 4\sqrt{\frac{\mu(L+\lambda)}{\lambda(\mu+\lambda)}} k$  iterations to approximately solve (7) at iteration  $k$ . Then, we have

$$F(x^k) - F^* \leq 8 \left( 1 - \sqrt{\frac{\mu}{\lambda}} \right)^k (F(x^0) - F^*),$$

where  $F^* = F(x^*)$ . As a result, the total number of communications required to reach  $\varepsilon$ -approximate solution is

$$\mathcal{O} \left( \sqrt{\frac{\lambda}{\mu}} \log \frac{1}{\varepsilon} \right).$$

The corresponding local gradient complexity is

$$\mathcal{O} \left( \sqrt{\frac{L+\lambda}{\mu}} \log \frac{1}{\varepsilon} \left( \log \frac{L\lambda n}{\mu} + \log \frac{1}{\varepsilon} \right) \right) = \tilde{\mathcal{O}} \left( \sqrt{\frac{L+\lambda}{\mu}} \right).$$

As expected, the communication complexity of IAPGD + AGD is  $\mathcal{O} \left( \sqrt{\frac{\lambda}{\mu}} \log \frac{1}{\varepsilon} \right)$ , thus optimal. On the other hand, the local gradient complexity is  $\tilde{\mathcal{O}} \left( \sqrt{\frac{L+\lambda}{\mu}} \right)$ . For  $\lambda = \mathcal{O}(L)$  this simplifies to  $\tilde{\mathcal{O}} \left( \sqrt{\frac{L}{\mu}} \right)$ , which is, up to log and constant factors identical to the lower bound on the local gradient calls.

#### IAPGD + Katyusha

In practice, the local objectives  $f_i$ 's often correspond to a loss of some model on the given client's data. In such a case, each function  $f_i$  is of the finite-sum structure:  $f_i(x_i) = \frac{1}{m} \sum_{j=1}^m \tilde{f}_{i,j}(x_i)$ .

Clearly, if  $m$  is large, solving the local subproblem with AGD is rather inefficient as it does not take an advantage of the finite-sum structure. To tackle this issue, we propose solving the local subproblem (7) using Katyusha.<sup>10</sup>

**Theorem 4.3** Let  $\tilde{f}_{i,j}$  be  $\tilde{L}$ -smooth and  $f_i$  be  $\mu$ -strongly convex for all  $1 \leq i \leq n, 1 \leq j \leq m$ .<sup>11</sup>

<sup>9</sup>The work [50] considers the distributed multi-task learning objective that is more general than (2).

<sup>10</sup>Essentially any accelerated variance reduced algorithm can be used instead of Katyusha, for example ASDCA [46], APCG [29], Point-SAGA [9], MiG [56], SAGA-SSNM [55] and others.

<sup>11</sup>Consequently, we have  $\tilde{L} \geq L \geq \frac{\tilde{L}}{m}$ .

Let Katyusha with starting point  $y_i^k$  be employed for  $T_k = \mathcal{O}\left(\left(m + \sqrt{m \frac{\tilde{L} + \lambda}{\mu + \lambda}}\right) \left(\log \frac{1}{R^2} + k \sqrt{\frac{\mu}{\lambda}}\right)\right)$  iterations to approximately solve (7) at iteration  $k$  of IAPGD for some small  $R$  (see proof for details). Given that the iterate sequence  $\{x^k\}_{k=0}^\infty$  is bounded, the expected communication complexity of IAPGD+Katyusha is

$$\mathcal{O}\left(\sqrt{\frac{\lambda}{\mu}} \log \frac{1}{\epsilon}\right),$$

while the local summand gradient complexity is

$$\tilde{\mathcal{O}}\left(m \sqrt{\frac{\lambda}{\mu}} + \sqrt{m \frac{\tilde{L}}{\mu}}\right).$$

Theorem 4.3 shows that local Katyusha enjoys the optimal communication complexity. Furthermore, if  $\sqrt{m\lambda} = \mathcal{O}(\tilde{L})$ , the total expected number of local gradients becomes optimal as well (see Sec. 3.2).

There is, however, a notable drawback of Theorem 4.3 over Theorem 4.2 – Theorem 4.3 requires a boundedness of the sequence  $\{x^k\}_{k=0}^\infty$  as an assumption, while this piece is not required for IAPGD+AGD due to its deterministic nature. In the next section, we devise a stochastic algorithm AL2SGD+ that does not require such an assumption. Furthermore, the local (summand) gradient complexity of AL2SGD+ does not depend on the extra log factors, and, at the same time, AL2SGD+ is optimal in a broader range of scenarios.

### 4.3 Accelerated L2SGD+

In this section, we introduce accelerated version of L2SGD+ [19], which can be viewed as a variance-reduced variant of FedAvg devised to solve (2). The proposed algorithm, AL2SGD+, is stated as Algorithm 4 in the Appendix. From high-level point of view, AL2SGD+ is nothing but L-Katyusha with non-uniform minibatch sampling.<sup>12</sup> In contrast to the approach from Section 4.2, AL2SGD+ does not treat  $f$  as a proximable regularizer, but rather directly constructs  $g^k$ —a non-uniform minibatch variance reduced stochastic estimator of  $\nabla F(x^k)$ . Next, we state the communication and the local summand gradient complexity of AL2SGD+.

**Theorem 4.4** *Suppose that the parameters of AL2SGD+ are chosen as stated in Proposition E.4 in the Appendix. In such case, the communication complexity of AL2SGD+ with  $\rho = p(1 - p)$ , where  $p = \frac{\lambda}{\lambda + \tilde{L}}$ , is*

$$\mathcal{O}\left(\sqrt{\frac{\min\{\tilde{L}, \lambda\}}{\mu}} \log \frac{1}{\epsilon}\right)$$

(see Sec. E.2 of the Appendix) while the local gradient complexity of AL2SGD+ for  $\rho = \frac{1}{m}$  and  $p = \frac{\lambda}{\lambda + \tilde{L}}$  is

$$\mathcal{O}\left(\left(m + \sqrt{\frac{m(\tilde{L} + \lambda)}{\mu}}\right) \log \frac{1}{\epsilon}\right).$$

The communication complexity of AL2SGD+ is optimal regardless of the relative comparison of  $\tilde{L}$ ,  $\lambda$ , which is an improvement over the previous methods. Furthermore, AL2SGD+ with a slightly different parameters choice enjoys the local gradient complexity which is optimal once  $\lambda = \mathcal{O}(\tilde{L})$ .

## 5 Experiments

We present empirical evidence to support the theoretical claims of this work. Due to space limitations, we present a fraction of the experiments here only. The remaining plots, as well as the details on the experimental setup, can be found in Section B of the Appendix.

<sup>12</sup> L-Katyusha [42] is a variant of Katyusha with a random inner loop length.



In the first experiment, we study the most practical/ realistic scenario with where the local objective is of a finite-sum structure, while the local oracle provides us with gradients of the summands. In this work, we developed two algorithms capable of dealing with the summand oracle efficiently: IAPGD+Katyusha and AL2SGD+. We compare both methods against the baseline L2SGD+ from [19].

The results are presented in Figure 1. In terms of the number of communication rounds, both AL2SGD+ and IAPGD+Katyusha are significantly superior to the L2SGD+, as theory predicts. The situation is, however, very different when looking at the local computation. While AL2SGD+ performs clearly the best, IAPGD+Katyusha falls behind L2SGD+. We presume this happened due to the large constant and log factors in the local complexity of IAPGD+Katyusha.

In the second experiments, we compare two variants of APGD presented in Section 4.1: APGD1 (Algorithm 2) and APGD2 (Algorithm 3). We consider several synthetic instances of (2) where we vary  $\lambda$  and keep remaining parameters (i.e.,  $L, \mu$ ) fixed. Our theory predicts that while the rate of APGD2 should not be influenced by varying  $\lambda$ , the rate of APGD1 should grow as  $\mathcal{O}(\sqrt{\lambda})$ . Similarly, APGD1 should be favourable if  $\lambda \leq L = 1$ , while APGD2 should be the algorithm of choice for  $\lambda > L = 1$ . As expected, Figure 2 confirms both claims.

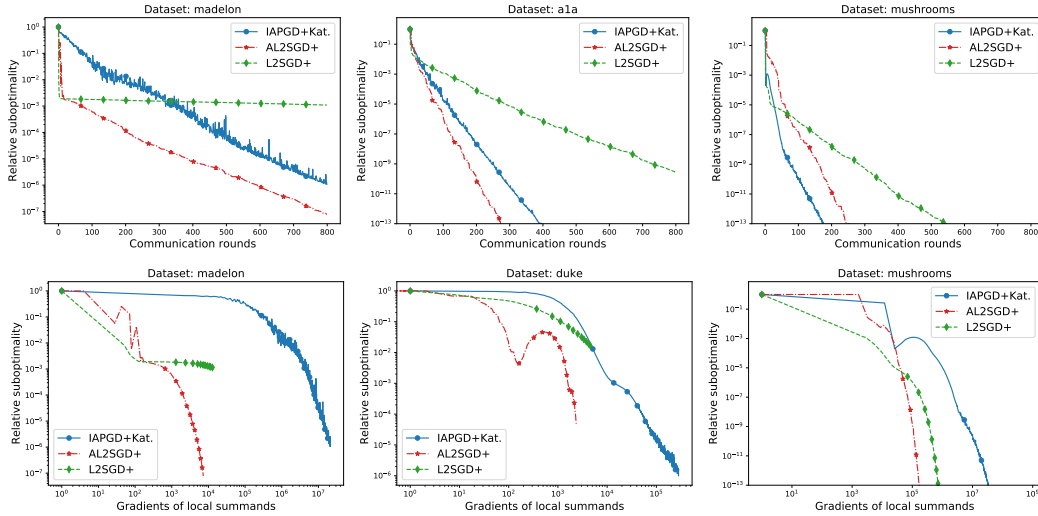

Figure 1: Comparison of IAPGD+Katyusha, AL2SGD+ and L2SDG+ on logistic regression with LIBSVM datasets [7]. Each client owns a random, mutually disjoint subset of the full dataset. First row: communication complexity, second row: local computation complexity for the same experiment.

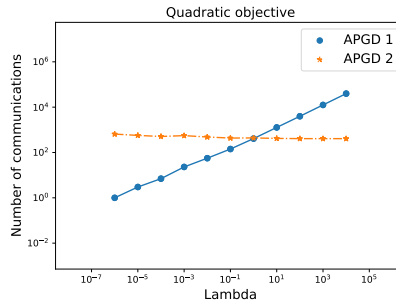

Figure 2: Effect of the parameter  $\lambda$  on the communication complexity of APGD1 and APGD2. For each value of  $\lambda$  the y-axis indicates the number of communication required to get  $10^4$ -times closer to the optimum compared to the starting point. Quadratic objective with  $n = 50, d = 50$ .

## Broader Impact

The paper presents lower and upper complexity bounds for the personalized FL formulation (2). While the topic this paper studies—personalized FL—already has a significant societal impact since FL solutions have been and are being deployed in practice, our results are of a theoretical nature. Consequently, the broader impact discussion for this work specifically is not applicable.

## Funding Disclosure

All authors were supported by the KAUST Baseline Research Scheme, and are thankful to support offered by the KAUST Visual Computing Center.

## References

- [1] Alekh Agarwal and Leon Bottou. A lower bound for the optimization of finite sums. *Proceedings of the 32nd International Conference on Machine Learning*, 2015.
- [2] Alekh Agarwal, Martin J Wainwright, Peter L Bartlett, and Pradeep K Ravikumar. Information-theoretic lower bounds on the oracle complexity of convex optimization. In *Advances in Neural Information Processing Systems*, pages 1–9, 2009.
- [3] Zeyuan Allen-Zhu. Katyusha: The first direct acceleration of stochastic gradient methods. *The Journal of Machine Learning Research*, 18(1):8194–8244, 2017.
- [4] Eric Balkanski and Yaron Singer. Parallelization does not accelerate convex optimization: Adaptivity lower bounds for non-smooth convex minimization. *arXiv preprint arXiv:1808.03880*, 2018.
- [5] Amir Beck. *First-order methods in optimization*, volume 25. SIAM, 2017.
- [6] Amir Beck and Marc Teboulle. A fast iterative shrinkage-thresholding algorithm for linear inverse problems. *SIAM journal on imaging sciences*, 2(1):183–202, 2009.
- [7] Chih-Chung Chang and Chih-Jen Lin. Libsvm: A library for support vector machines. *ACM transactions on intelligent systems and technology (TIST)*, 2(3):1–27, 2011.
- [8] Luca Corinzia and Joachim M Buhmann. Variational federated multi-task learning. *arXiv preprint arXiv:1906.06268*, 2019.
- [9] Aaron Defazio. A simple practical accelerated method for finite sums. In *Advances in neural information processing systems*, pages 676–684, 2016.
- [10] Yuyang Deng, Mohammad Mahdi Kamani, and Mehrdad Mahdavi. Adaptive personalized federated learning. *arXiv preprint arXiv:2003.13461*, 2020.
- [11] Jelena Diakonikolas and Cristóbal Guzmán. Lower bounds for parallel and randomized convex optimization. *arXiv preprint arXiv:1811.01903*, 2018.
- [12] John Duchi, Feng Ruan, and Chulhee Yun. Minimax bounds on stochastic batched convex optimization. In *Conference On Learning Theory*, pages 3065–3162, 2018.
- [13] Hubert Eichner, Tomer Koren, H Brendan McMahan, Nathan Srebro, and Kunal Talwar. Semi-cyclic stochastic gradient descent. *Proceedings of the 36th International Conference on Machine Learning*, 2019.
- [14] Alireza Fallah, Aryan Mokhtari, and Asuman Ozdaglar. Personalized federated learning: A meta-learning approach. *arXiv preprint arXiv:2002.07948*, 2020.
- [15] Chelsea Finn, Pieter Abbeel, and Sergey Levine. Model-agnostic meta-learning for fast adaptation of deep networks. In *Proceedings of the 34th International Conference on Machine Learning-Volume 70*, pages 1126–1135. JMLR. org, 2017.
- [16] Eduard Gorbunov, Darina Dvinskikh, and Alexander Gasnikov. Optimal decentralized distributed algorithms for stochastic convex optimization. *arXiv preprint arXiv:1911.07363*, 2019.
- [17] Cristóbal Guzmán and Arkadi Nemirovski. On lower complexity bounds for large-scale smooth convex optimization. *Journal of Complexity*, 31(1):1–14, 2015.

- [18] Filip Hanzely, Dmitry Kovalev, and Peter Richtárik. Variance reduced coordinate descent with acceleration: New method with a surprising application to finite-sum problems. *arXiv preprint arXiv:2002.04670*, 2020.
- [19] Filip Hanzely and Peter Richtárik. Federated learning of a mixture of global and local models. *arXiv preprint arXiv:2002.05516*, 2020.
- [20] Andrew Hard, Kanishka Rao, Rajiv Mathews, Swaroop Ramaswamy, Françoise Beaufays, Sean Augenstein, Hubert Eichner, Chloé Kiddon, and Daniel Ramage. Federated learning for mobile keyboard prediction. *arXiv preprint arXiv:1811.03604*, 2018.
- [21] Hadrien Hendrikx, Francis Bach, and Laurent Massoulié. An optimal algorithm for decentralized finite sum optimization. *arXiv preprint arXiv:2005.10675*, 2020.
- [22] Peter Kairouz, H. Brendan McMahan, and et al. Advances and open problems in federated learning. *arXiv preprint arXiv:1912.04977v1*, 2019.
- [23] Mikhail Khodak, Maria-Florina F Balcan, and Ameet S Talwalkar. Adaptive gradient-based meta-learning methods. In *Advances in Neural Information Processing Systems*, pages 5915–5926, 2019.
- [24] Jakub Konečný, H Brendan McMahan, Daniel Ramage, and Peter Richtárik. Federated optimization: Distributed machine learning for on-device intelligence. *arXiv preprint arXiv:1610.02527*, 2016.
- [25] Viraj Kulkarni, Milind Kulkarni, and Aniruddha Pant. Survey of personalization techniques for federated learning. *arXiv preprint arXiv:2003.08673*, 2020.
- [26] Guanghui Lan, Soomin Lee, and Yi Zhou. Communication-efficient algorithms for decentralized and stochastic optimization. *Mathematical Programming*, pages 1–48, 2018.
- [27] Guanghui Lan and Yi Zhou. An optimal randomized incremental gradient method. *Mathematical programming*, 171(1-2):167–215, 2018.
- [28] Tian Li, Anit Kumar Sahu, Manzil Zaheer, Maziar Sanjabi, Ameet Talwalkar, and Virginia Smith. Federated optimization in heterogeneous networks. *arXiv preprint arXiv:1812.06127*, 2018.
- [29] Qihang Lin, Zhaosong Lu, and Lin Xiao. An accelerated randomized proximal coordinate gradient method and its application to regularized empirical risk minimization. *SIAM Journal on Optimization*, 25(4):2244–2273, 2015.
- [30] Sulin Liu, Sinno Jialin Pan, and Qirong Ho. Distributed multi-task relationship learning. In *Proceedings of the 23rd ACM SIGKDD International Conference on Knowledge Discovery and Data Mining*, pages 937–946, 2017.
- [31] Yishay Mansour, Mehryar Mohri, Jae Ro, and Ananda Theertha Suresh. Three approaches for personalization with applications to federated learning. *arXiv preprint arXiv:2002.10619*, 2020.
- [32] Brendan McMahan, Eider Moore, Daniel Ramage, Seth Hampson, and Blaise Agüera y Arcas. Communication-Efficient Learning of Deep Networks from Decentralized Data. In *Proceedings of the 20th International Conference on Artificial Intelligence and Statistics*, pages 1273–1282. PMLR, 2017.
- [33] H Brendan McMahan, Eider Moore, Daniel Ramage, Seth Hampson, et al. Communication-efficient learning of deep networks from decentralized data. *arXiv preprint arXiv:1602.05629*, 2016.
- [34] Arkadi Nemirovski. On parallel complexity of nonsmooth convex optimization. *Journal of Complexity*, 10(4):451–463, 1994.
- [35] Arkadi S Nemirovski and Yuri Nesterov. Optimal methods of smooth convex minimization. *Zhurnal Vychislitel’noi Matematiki i Matematicheskoi Fiziki*, 25(3):356–369, 1985.
- [36] Arkadii Semenovich Nemirovsky and David Borisovich Yudin. Problem complexity and method efficiency in optimization. 1983.
- [37] Yuri Nesterov. *Lectures on convex optimization*, volume 137. Springer, 2018.
- [38] Yuri E Nesterov. A method for solving the convex programming problem with convergence rate  $O(1/k^2)$ . In *Dokl. akad. nauk Sssr*, volume 269, pages 543–547, 1983.

- [39] Phuong-Ha Ngyuen, Lam Nguyen, and Marten van Dijk. Tight dimension independent lower bound on the expected convergence rate for diminishing step sizes in SGD. In *Advances in Neural Information Processing Systems*, pages 3660–3669, 2019.
- [40] Reese Pathak and Martin J Wainwright. FedSplit: An algorithmic framework for fast federated optimization. *arXiv preprint arXiv:2005.05238*, 2020.
- [41] Daniel Peterson, Pallika Kanani, and Virendra J Marathe. Private federated learning with domain adaptation. *arXiv preprint arXiv:1912.06733*, 2019.
- [42] Xun Qian, Zheng Qu, and Peter Richtárik. L-SVRG and L-Katyusha with arbitrary sampling. *arXiv preprint arXiv:1906.01481*, 2019.
- [43] Maxim Raginsky and Alexander Rakhlin. Information-based complexity, feedback and dynamics in convex programming. *IEEE Transactions on Information Theory*, 57(10):7036–7056, 2011.
- [44] Kevin Scaman, Francis Bach, Sébastien Bubeck, Laurent Massoulié, and Yin Tat Lee. Optimal algorithms for non-smooth distributed optimization in networks. In *Advances in Neural Information Processing Systems*, pages 2740–2749, 2018.
- [45] Mark Schmidt, Nicolas L Roux, and Francis R Bach. Convergence rates of inexact proximal-gradient methods for convex optimization. In *Advances in neural information processing systems*, pages 1458–1466, 2011.
- [46] Shai Shalev-Shwartz and Tong Zhang. Accelerated proximal stochastic dual coordinate ascent for regularized loss minimization. In *International Conference on Machine Learning*, pages 64–72, 2014.
- [47] Adam Smith, Abhradeep Thakurta, and Jalaj Upadhyay. Is interaction necessary for distributed private learning? In *2017 IEEE Symposium on Security and Privacy (SP)*, pages 58–77. IEEE, 2017.
- [48] Virginia Smith, Chao-Kai Chiang, Maziar Sanjabi, and Ameet S Talwalkar. Federated multi-task learning. In *Advances in Neural Information Processing Systems*, pages 4424–4434, 2017.
- [49] Paul Vanhaesebrouck, Aurélien Bellet, and Marc Tommasi. Decentralized collaborative learning of personalized models over networks. *International Conference on Artificial Intelligence and Statistics*, pages 509–517, 2017.
- [50] Weiran Wang, Jialei Wang, Mladen Kolar, and Nathan Srebro. Distributed stochastic multi-task learning with graph regularization. *arXiv preprint arXiv:1802.03830*, 2018.
- [51] Blake E Woodworth and Nati Srebro. Tight complexity bounds for optimizing composite objectives. In *Advances in neural information processing systems*, pages 3639–3647, 2016.
- [52] Blake E Woodworth, Jialei Wang, Adam Smith, Brendan McMahan, and Nati Srebro. Graph oracle models, lower bounds, and gaps for parallel stochastic optimization. In *Advances in neural information processing systems*, pages 8496–8506, 2018.
- [53] Qiong Wu, Kaiwen He, and Xu Chen. Personalized federated learning for intelligent IoT applications: A cloud-edge based framework. *arXiv preprint arXiv:2002.10671*, 2020.
- [54] Yue Zhao, Meng Li, Liangzhen Lai, Naveen Suda, Damon Civin, and Vikas Chandra. Federated learning with non-iid data. *arXiv preprint arXiv:1806.00582*, 2018.
- [55] Kaiwen Zhou. Direct acceleration of SAGA using sampled negative momentum. In *International Conference on Artificial Intelligence and Statistics*, 2018.
- [56] Kaiwen Zhou, Fanhua Shang, and James Cheng. A simple stochastic variance reduced algorithm with fast convergence rates. In *The 35th International Conference on Machine Learning*, 2018.

## A Table of frequently used notation

To enhance the reader's convenience when navigating, we here reiterate our notation:

Table 3: Summary of frequently used notation.

| <b>General</b>                                          |                                                                                         |          |
|---------------------------------------------------------|-----------------------------------------------------------------------------------------|----------|
| $F : \mathbb{R}^{nd} \rightarrow \mathbb{R}$            | Global objective                                                                        | (2)      |
| $f_i : \mathbb{R}^n \rightarrow \mathbb{R}$             | Local loss on $i$ -th node                                                              | (2)      |
| $x_i \in \mathbb{R}^d$                                  | Local model on $i$ -th node                                                             | (2)      |
| $x \in \mathbb{R}^{nd}$                                 | Concatenation of local models $x = [x_1, x_2, \dots, x_n]$                              | (2)      |
| $f : \mathbb{R}^{nd} \rightarrow \mathbb{R}$            | Average loss over nodes $f(x) := 1/n \sum_{i=1}^n f_i(x_i)$                             | (2)      |
| $\psi : \mathbb{R}^{nd} \rightarrow \mathbb{R}$         | Dissimilarity penalty $\psi(x) := \frac{1}{2n} \sum_{i=1}^n \ x_i - \bar{x}\ ^2$        | (2)      |
| $\lambda \geq 0$                                        | Weight of dissimilarity penalty                                                         | (2)      |
| $\text{Loc}(x_i, i)$                                    | local oracle: { proximal, gradient, summand gradient}                                   | Sec. 3   |
| $\mu \geq 0$                                            | Strong convexity constant of each $f_i$ ( $\tilde{f}_{i,j}$ )                           |          |
| $L \geq 0$                                              | Smoothness constant of each $f_i$                                                       |          |
| $\text{prox}$                                           | Proximal operator                                                                       | (4)      |
| $m \geq 1$                                              | Number of local summands of $i$ -th local loss $f_i = 1/m \sum_{j=1}^m \tilde{f}_{i,j}$ | Sec. 4.2 |
| $\tilde{f}_{i,j} : \mathbb{R}^n \rightarrow \mathbb{R}$ | $j$ -th summand of $i$ -th local loss, $1 \leq j \leq m$                                | Sec. 4.2 |
| $\tilde{L} \geq 0$                                      | Smoothness constant of each $\tilde{f}_{i,j}$                                           | Sec. 4.2 |
| $\varepsilon \geq 0$                                    | Precision                                                                               |          |
| $x^0 \in \mathbb{R}^{nd}$                               | Algorithm initialization                                                                |          |
| $x^* \in \mathbb{R}^{nd}$                               | Optimal solution of (2), $x^* = [x_1^*, x_2^*, \dots, x_n^*]$                           |          |
| $F^* \in \mathbb{R}$                                    | Function value at minimum, $F^* = F(x^*)$                                               |          |
| <b>Algorithms</b>                                       |                                                                                         |          |
| APGD1                                                   | Accelerated Proximal Gradient Descent (Algorithm 2)                                     | Sec. 4.1 |
| APGD2                                                   | Accelerated Proximal Gradient Descent (Algorithm 3)                                     | Sec. 4.1 |
| IAPGD                                                   | Inexact Accelerated Proximal Gradient Descent (Algorithm 1)                             | Sec. 4.2 |
| IAPGD + AGD                                             | IAPGD with AGD as a local subsolver                                                     | Sec. 4.2 |
| IAPGD + Katyusha                                        | IAPGD with Katyusha as a local subsolver                                                | Sec. 4.2 |
| AL2SGD+                                                 | Accelerated Loopless Local Gradient Descent (Algorithm 4)                               | Sec. 4.3 |
| $p, \rho$                                               | Probabilities; parameters of AL2SGD+                                                    | Sec. C   |

| Dataset   | $n$ | $m$ | $d$  | $\lambda$ | $p = \rho$ |
|-----------|-----|-----|------|-----------|------------|
| a1a       | 5   | 321 | 119  | 0.003     | 0.003      |
| duke      | 11  | 4   | 7129 | 0.333     | 0.250      |
| mushrooms | 12  | 677 | 112  | 0.001     | 0.001      |
| madelon   | 200 | 10  | 500  | 0.111     | 0.100      |
| phishing  | 335 | 33  | 68   | 0.031     | 0.030      |

Table 4: Number of workers and local functions on workers for different datasets for Figures 3 and 4.

## B Extra experiments and details on the experimental setup

In this section, we provide additional experiments comparing introduced algorithms on logistic regression with LIBSVM data.<sup>13</sup> The local objectives are constructed by evenly dividing to the workers. We vary the parameters  $m, n$  among the datasets as specified in Table 4.

We consider two types of assignment of data to the clients: *homogeneous* assignment, where local data are assigned uniformly at random and *heterogeneous* assignment, where we first sort the dataset according to labels, and then assign it to the clients in the given order. The heterogeneous assignment is supposed to better simulate the real-world scenarios. Next, we normalize the data  $a_1, a_2, \dots$ , so that  $f_{i,j}$  is 1-smooth and set  $\mu = 10^{-4}$ .

For each dataset we select rather small value of  $\lambda$ , specifically  $\lambda = \frac{1}{m}$ . Lastly, for L2SGD+ and AL2SGD+, we choose  $p = \rho = 1/m$ , which is in the given setup optimal up to a constant factor in terms of the communication. We run the algorithms for  $10^3$  communication rounds and track relative suboptimality<sup>14</sup> after each aggregation. Similarly to Figure 1, we plot relative suboptimality againsts the number of communication rounds and local gradients computed.

The remaining parameters are selected according to theory for each algorithm with one exception: For IAPGD+Katyusha we run Katyusha as a local subsolver at the iteration  $k$  for

$$\sqrt{\frac{m(L + \lambda)}{\mu + \lambda}} + \sqrt{\frac{m\mu(L + \lambda)}{\lambda(\mu + \lambda)}}k$$

iterations (slightly smaller than what our theory suggests).

### Extra experiments

In the first experiment from this section, we extend the comparison of the stochastic algorithms from Figure 1 to additional datasets. Figure 3 shows a similar behaviour comparing to Figure 1, demonstrating the robustness of our results.

In the second experiment, we investigate the heterogeneous split of the data among the clients mentioned earlier. Figure 4 shows the result. We can see that the data heterogeneity does not influence the convergence significantly and we observe a similar behaviour compared to the homogenous case.

<sup>13</sup>Logistic regression loss for on the  $j$ -th data point  $a_j \in \mathbb{R}^d$  is defined as  $\phi_j(x) = \log(1 + \exp(b_j a_j^\top x)) + \frac{\lambda}{2} \|x\|_2^2$ , where  $b_j \in \{-1, 1\}$  is the corresponding label.

<sup>14</sup>Relative suboptimality means that for iterates  $\{x^k\}_{k=1}^K$  we plot  $\left\{ \frac{f(x^k) - f(x^*)}{f(x^0) - f(x^*)} \right\}_{k=1}^K$ .

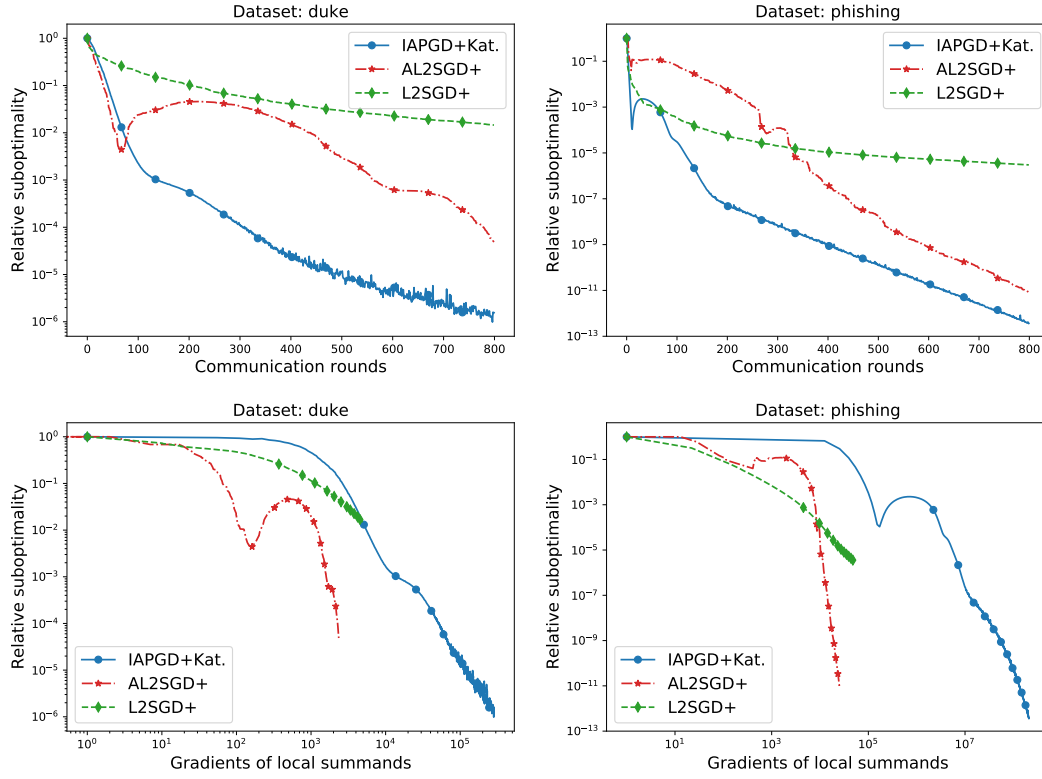

Figure 3: Same as Figure 1, but a different datasets.

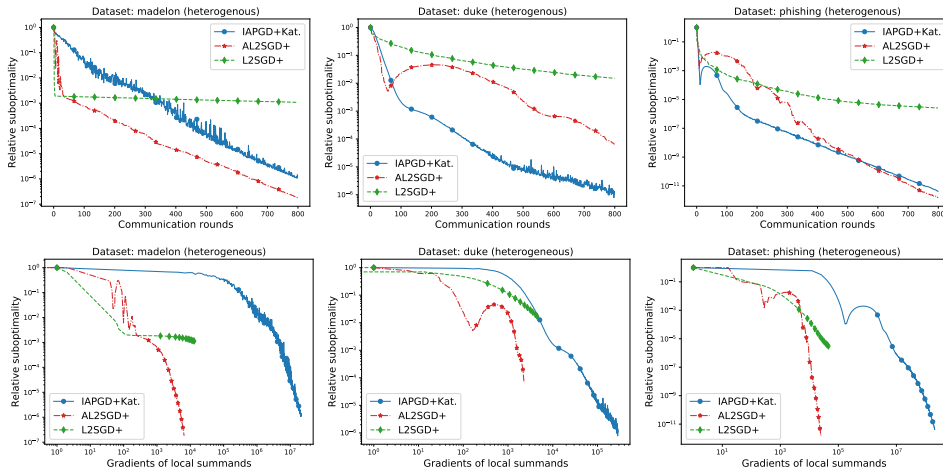

Figure 4: Same experiment as Figure 1, but a heterogeneous data split.

## C Missing parts for Section 4

In this section, we state the algorithms that were mentioned in the main paper: APGD1 as Algorithm 2, APGD2 as Algorithm 3 and AL2SGD+ as Algorithm 4. Next, we state the convergence rates of APGD1, APGD2 as Proposition C.1 and Proposition C.2 respectively. Lastly, we justify (6) via Lemma C.3.

**Proposition C.1** [5] *Let  $\{x^k\}_{k=0}^\infty$  be a sequence of iterates generated by Algorithm 2. Then, we have for all  $k \geq 0$ :*

$$F(x^k) - F^* \leq \left(1 - \sqrt{\frac{\mu}{\lambda + \mu}}\right)^k \left(F(x^0) - F^* + \frac{\mu}{2n} \|x^0 - x^*\|^2\right).$$

---

### Algorithm 2 APGD1

---

**Require:** Starting point  $y^0 = x^0 \in \mathbb{R}^{nd}$

**for**  $k = 0, 1, 2, \dots$  **do**

**Central server** computes the average  $\bar{y}^k = \frac{1}{n} \sum_{i=1}^n y_i^k$

    For all **clients**  $i = 1, \dots, n$ :

        Solve the regularized local problem  $x_i^{k+1} = \operatorname{argmin}_{z \in \mathbb{R}^d} f_i(z) + \frac{\lambda}{2} \|z - \bar{y}^k\|^2$

        Take the momentum step  $y_i^{k+1} = x_i^{k+1} + \frac{\sqrt{\lambda} - \sqrt{\mu}}{\sqrt{\lambda} + \sqrt{\mu}} (x_i^{k+1} - x_i^k)$

**end for**

---

**Proposition C.2** [5] *Let  $\{x^k\}_{k=0}^\infty$  be a sequence of iterates generated by Algorithm 3. Then, we have for all  $k \geq 0$ :*

$$F(x^k) - F^* \leq \left(1 - \sqrt{\frac{\mu}{L + \mu}}\right)^k \left(F(x^0) - F^* + \frac{\mu}{2n} \|x^0 - x^*\|^2\right).$$

---

### Algorithm 3 APGD2

---

**Require:** Starting point  $y^0 = x^0 \in \mathbb{R}^{nd}$

**for**  $k = 0, 1, 2, \dots$  **do**

    For all **clients**  $i = 1, \dots, n$ :

        Take a local gradient step  $\tilde{y}_i^k = y_i^k - \frac{1}{L} \nabla f_i(y_i^k)$

**Central server** computes the average  $\bar{y}^k = \frac{1}{n} \sum_{i=1}^n \tilde{y}_i^k$

    For all **clients**  $i = 1, \dots, n$ :

        Take a prox step w.r.t  $\lambda\psi$ :  $x_i^{k+1} = \frac{L\tilde{y}_i^k + \lambda\bar{y}^k}{L + \lambda}$

        Take the momentum step  $y_i^{k+1} = x_i^{k+1} + \frac{\sqrt{\frac{L}{\mu}} - 1}{\sqrt{\frac{L}{\mu}} + 1} (x_i^{k+1} - x_i^k)$

**end for**

---

**Lemma C.3** *Let*

$$x^{k+1} = \operatorname{prox}_{\frac{1}{L_h} \phi} \left( x^k - \frac{1}{L_h} \nabla h(x^k) \right), \quad (8)$$

*for  $h(x) := \lambda\psi(x) + \frac{\mu}{2n} \|x\|^2$  and  $\phi(x) := f(x) - \frac{\mu}{2n} \|x\|^2$ . Then, we have*

$$x_i^{k+1} = \operatorname{prox}_{\frac{1}{\lambda} f_i}(\bar{x}^k).$$

*Further, the iteration complexity of the above process is  $\mathcal{O}\left(\frac{\lambda}{\mu} \log \frac{1}{\varepsilon}\right)$ .*

**Proof:**



Since function  $\psi$  is  $\frac{1}{n}$ -smooth and  $(\nabla\psi(x))_i = \frac{1}{n}(x_i - \bar{x})$  [19], we have  $L_h = \frac{\lambda+\mu}{n}$ ,  $(\nabla h(x))_i = \frac{\lambda}{n}(x_i - \bar{x}) + \frac{\mu}{n}x_i$  and thus

$$\begin{aligned} x_i^{k+1} &= \operatorname{argmin}_{z \in \mathbb{R}^d} \left\| \frac{1}{n}f_i(z) - \frac{\mu}{2n}\|z\|^2 + \frac{\lambda+\mu}{2n} \left\| z - \left( x_i^k - \frac{n}{\lambda+\mu} \left( \frac{\lambda}{n}(x_i^k - \bar{x}^k) + \frac{\mu}{n}x_i^k \right) \right) \right\|^2 \right\|^2 \\ &= \operatorname{argmin}_{z \in \mathbb{R}^d} \left\| f_i(z) - \frac{\mu}{2}\|z\|^2 + \frac{\lambda+\mu}{2} \left\| z - \frac{\lambda}{\lambda+\mu}\bar{x}^k \right\|^2 \right\|^2 \\ &= \operatorname{argmin}_{z \in \mathbb{R}^d} f_i(z) + \frac{\lambda}{2}\|z - \bar{x}^k\|^2 = \operatorname{prox}_{\frac{\lambda}{2}f_i}(\bar{x}^k). \end{aligned}$$

Let us now discuss the convergence rate. Given that function  $h$  is  $\mu_h$ -strongly convex, iteration complexity of (4) to reach  $\varepsilon$ -suboptimality is  $\mathcal{O}\left(\frac{L_h}{\mu_h} \log \frac{1}{\varepsilon}\right)$ . Since  $L_h = \frac{\lambda+\mu}{n}$  (note that  $\psi$  is  $\frac{1}{n}$  smooth [19]) and  $\mu_h = \frac{\mu}{n}$ , the iteration complexity of the process (6) becomes  $\mathcal{O}\left(\frac{\lambda}{\mu} \log \frac{1}{\varepsilon}\right)$ , as desired.

---

**Algorithm 4** AL2SGD+

---

**Require:**  $0 < \theta_1, \theta_2 < 1, \eta, \beta, \gamma > 0, \rho, p \in (0, 1), y^0 = z^0 = x^0 = w^0 \in \mathbb{R}^{nd}$

**for**  $k = 0, 1, 2, \dots$  **do**

  For all **clients**  $i = 1, \dots, n$ :

$x_i^k = \theta_1 z_i^k + \theta_2 w_i^k + (1 - \theta_1 - \theta_2) y_i^k$

$\xi = 1$  with probability  $p$  and 0 with probability  $1 - p$

**if**  $\xi = 0$  **then**

      For all **clients**  $i = 1, \dots, n$ :

$g_i^k = \frac{1}{n(1-p)} \left( \nabla \tilde{f}_{i,j}(x_i^k) - \nabla \tilde{f}_{i,j}(w_i^k) \right) + \frac{1}{n} \nabla f_i(w_i^k) + \frac{\lambda}{n}(w_i^k - \bar{w}^k)$

$y_i^{k+1} = x_i^k - \eta g_i^k$

**else**

**Central server** computes the average  $\bar{x}^k = \frac{1}{n} \sum_{i=1}^n x_i^k$  and sends it back to the clients

        For all **clients**  $i = 1, \dots, n$ :

$g_i^k = \frac{\lambda}{np}(x_i^k - \bar{x}^k) - \frac{(p^{-1}-1)\lambda}{n}(w_i^k - \bar{w}^k) + \frac{1}{n} \nabla f_i(w_i^k)$

          Set  $y_i^{k+1} = x_i^k - \eta g_i^k$

**end if**

      For all **clients**  $i = 1, \dots, n$ :

$z_i^{k+1} = \beta z_i^k + (1 - \beta)x_i^k + \frac{\gamma}{\eta}(y_i^{k+1} - x_i^k)$

$\xi' = 1$  with probability  $\rho$  and 0 with probability  $1 - \rho$

**if**  $\xi' = 0$  **then**

        For all **clients**  $i = 1, \dots, n$ :

$w_i^{k+1} = w_i^k$

**else**

        For all **clients**  $i = 1, \dots, n$ :

$w_i^{k+1} = y_i^{k+1}$

          Evaluate and store  $\nabla f_i(w_i^{k+1})$

**Central server** computes the average  $\bar{w}^{k+1} = \frac{1}{n} \sum_{i=1}^n w_i^{k+1}$  and sends it back to the clients

**end if**

**end for**

---

## D Proof of Theorem 3.1

In this section, we provide the proof of the Theorem 3.1. In order to do so, we construct a set of function  $f_1, f_2, \dots, f_n$  such that for any algorithm satisfying Assumption 3.1 and the number of the iterations  $k$ , one must have  $\|x^k - x^*\|^2 \geq \frac{1}{2} \left(1 - 10 \max \left\{ \sqrt{\frac{\mu}{\lambda}}, \sqrt{\frac{\mu}{L-\mu}} \right\}\right)^{C(k)+1} \|x^0 - x^*\|^2$ .

Without loss of generality, we consider  $x^0 = 0 \in \mathbb{R}^{dn}$ . The rationale behind our proof goes as follows: we show that the  $nd$ -dimensional vector  $x^k$  has “a lot of” zero elements while  $x^*$  does not, and hence we might lower bound  $\|x^k - x^*\|^2$  by  $\sum_{j:(x^k)_j=0} (x^*)_j^2$ , which will be large enough. As the main idea of the proof is given, let us introduce our construction.

Let  $d = 2T$  for some large  $T$  and define the local objectives as follows for even  $n$

$$\begin{aligned} f_1(y) = f_2(y) = \dots = f_{n/2}(y) &:= \frac{\mu}{2} \|y\|^2 + ay_1 + \frac{\lambda}{2} c \left( \sum_{i=1}^{T-1} (y_{2i} - y_{2i+1})^2 \right) + \frac{\lambda b}{2} y_{2T}^2 \\ f_{n/2+1}(y) = f_{n/2+2}(y) = \dots = f_n(y) &:= \frac{\mu}{2} \|y\|^2 + \frac{\lambda}{2} c \left( \sum_{i=0}^{T-1} (y_{2i+1} - y_{2i+2})^2 \right) \end{aligned}$$

and as

$$\begin{aligned} f_1(y) = f_2(y) = \dots = f_M(y) &:= \frac{M+1}{M} \frac{\mu}{2} \|y\|^2 + ay_1 + \frac{\lambda}{2} \frac{M+1}{M} c \left( \sum_{i=1}^{T-1} (y_{2i} - y_{2i+1})^2 \right) + \frac{\lambda b}{2} y_{2T}^2 \\ f_{M+1}(y) = f_{M+2}(y) = \dots = f_n(y) &:= \frac{\mu}{2} \|y\|^2 + \frac{\lambda}{2} c \left( \sum_{i=0}^{T-1} (y_{2i+1} - y_{2i+2})^2 \right) \end{aligned}$$

for  $n = 2M + 1, M \geq 1$ . Note that the smoothness of the objective is now effectively controlled by parameter  $c$ .

With such definition of functions  $f_i(x_i)$ , our objective is quadratic and can be written as

$$\frac{n}{\lambda} F(x) = \frac{1}{2} x^\top \mathbf{M} x + \frac{a}{\lambda} x_1, \quad (9)$$

where  $\mathbf{M}$  is matrix dependent on parity of  $n$ . For even  $n$ , we have

$$\begin{aligned} \mathbf{M} &:= \left( \mathbf{I} - \frac{1}{n} e e^\top \right) \otimes \mathbf{I} + \frac{\mu}{\lambda} \mathbf{I} + \begin{pmatrix} \mathbf{M}_1 & 0 \\ 0 & \mathbf{M}_2 \end{pmatrix}, \text{ where} \\ \mathbf{M}_1 &:= \mathbf{I} \otimes \begin{pmatrix} 0 & 0 & 0 & \dots & 0 \\ 0 & \begin{pmatrix} c & -c \\ -c & c \end{pmatrix} & 0 & \ddots & \vdots \\ 0 & 0 & \begin{pmatrix} c & -c \\ -c & c \end{pmatrix} & \ddots & \vdots \\ \vdots & \ddots & \ddots & \ddots & \vdots \\ 0 & \dots & \dots & \dots & b \end{pmatrix} \text{ and} \\ \mathbf{M}_2 &:= \mathbf{I} \otimes \begin{pmatrix} \begin{pmatrix} c & -c \\ -c & c \end{pmatrix} & 0 & \dots \\ 0 & \begin{pmatrix} c & -c \\ -c & c \end{pmatrix} & \dots \\ \vdots & \vdots & \ddots \end{pmatrix}. \end{aligned}$$

When  $n$  is odd, we have

$$\mathbf{M} := \left( \mathbf{I} - \frac{1}{n} \mathbf{e} \mathbf{e}^\top \right) \otimes \mathbf{I} + \frac{\mu}{\lambda} \mathbf{I} + \begin{pmatrix} \mathbf{M}_1 + \frac{\mu}{M\lambda} \mathbf{I} & 0 \\ 0 & \mathbf{M}_2 \end{pmatrix}, \text{ where}$$

$$\mathbf{M}_1 := \mathbf{I} \otimes \begin{pmatrix} 0 & 0 & 0 & \dots & 0 \\ 0 & \begin{pmatrix} \frac{(M+1)c}{M} & -\frac{(M+1)c}{M} \\ -\frac{(M+1)c}{M} & \frac{(M+1)c}{M} \end{pmatrix} & 0 & \ddots & \vdots \\ 0 & 0 & \begin{pmatrix} \frac{(M+1)c}{M} & -\frac{(M+1)c}{M} \\ -\frac{(M+1)c}{M} & \frac{(M+1)c}{M} \end{pmatrix} & \ddots & \vdots \\ \vdots & \ddots & \ddots & \ddots & \vdots \\ 0 & \dots & \dots & \dots & b \end{pmatrix} \text{ and}$$

$$\mathbf{M}_2 := \mathbf{I} \otimes \begin{pmatrix} \begin{pmatrix} c & -c \\ -c & c \end{pmatrix} & 0 & \dots \\ 0 & \begin{pmatrix} c & -c \\ -c & c \end{pmatrix} & \dots \\ \vdots & \vdots & \ddots \end{pmatrix}.$$

Note that our functions  $f_k$  depends on parameters  $a \in \mathbb{R}, b, c \in \mathbb{R}^+$ . We will choose these parameters later in the way that the optimal solution can be obtained easily.

Now let's discuss optimal model for the objective. Since the the objective is strongly convex, the optimum  $x^*$  is unique. Let us find what it is. For the sake of simplicity, denote  $y^* := x_1^*, z^* = x_n^*$ . Due to the symmetry, we must have

$$y^* = x_2^* = \dots x_{n/2}^*, \quad z^* = x_{n/2+1} = x_{n/2+2} = \dots x_{n-1}^* \quad \text{for even } n$$

and

$$y^* = x_2^* = \dots x_M^*, \quad z^* = x_{M+1} = \dots = x_{n-1}^* \quad \text{for odd } n.$$

Now we use the following lemma to express elements of  $y^*, z^*$  recursively.

**Lemma D.1** *Let*

$$w_i := \begin{cases} \begin{pmatrix} z_i^* \\ y_i^* \end{pmatrix} & \text{if } i \text{ is even} \\ \begin{pmatrix} y_i^* \\ z_i^* \end{pmatrix} & \text{if } i \text{ is odd} \end{cases}.$$

*Then, we have*

$$w_{i+1} = \mathbf{Q}_r w_i$$

*where*

$$\mathbf{Q}_r := \begin{pmatrix} -\frac{r}{c} & \frac{c + \frac{\mu}{\lambda} + r}{c} \\ -\frac{c + \frac{\mu}{\lambda} + r}{c} & \frac{(c + \frac{\mu}{\lambda} + r)^2}{cr} - \frac{c}{r} \end{pmatrix}$$

*and*

$$r = \begin{cases} \frac{1}{2} & \text{if } n \text{ is even} \\ \frac{M}{n} & \text{if } n \text{ is odd} \end{cases}.$$

To prove the lemma, we shall manipulate the first-order optimality conditions of (9).

**Proof:** For even  $n$ , the first-order optimality conditions yield

$$\left(c + \frac{1}{2} + \frac{\mu}{\lambda}\right) z_{2i-1}^* - cz_{2i}^* - \frac{1}{2} y_{2i-1}^* = 0 \quad \text{for } 1 \leq i \leq T \quad (10)$$

$$\left(c + \frac{1}{2} + \frac{\mu}{\lambda}\right) z_{2i}^* - cz_{2i-1}^* - \frac{1}{2} y_{2i}^* = 0 \quad \text{for } 1 \leq i \leq T \quad (11)$$

$$\left(c + \frac{1}{2} + \frac{\mu}{\lambda}\right) y_{2i}^* - cy_{2i+1}^* - \frac{1}{2} z_{2i}^* = 0 \quad \text{for } 1 \leq i \leq T-1 \quad (12)$$

$$\left(c + \frac{1}{2} + \frac{\mu}{\lambda}\right) y_{2i+1}^* - cy_{2i}^* - \frac{1}{2} z_{2i+1}^* = 0 \quad \text{for } 1 \leq i \leq T-1 \quad (13)$$

Equalities (10) and (11) can be equivalently written as

$$\begin{pmatrix} c & 0 \\ -c-r-\frac{\mu}{\lambda} & r \end{pmatrix} \begin{pmatrix} z_{2i}^* \\ y_{2i}^* \end{pmatrix} = \begin{pmatrix} c+r+\frac{\mu}{\lambda} & -r \\ -c & 0 \end{pmatrix} \begin{pmatrix} z_{2i-1}^* \\ y_{2i-1}^* \end{pmatrix} \quad \text{for } 1 \leq i \leq T \quad (14)$$

and consequently we must have for all  $1 \leq i \leq T$

$$\begin{aligned} \begin{pmatrix} z_{2i}^* \\ y_{2i}^* \end{pmatrix} &= \begin{pmatrix} c & 0 \\ -c-r-\frac{\mu}{\lambda} & r \end{pmatrix}^{-1} \begin{pmatrix} c+r+\frac{\mu}{\lambda} & -r \\ -c & 0 \end{pmatrix} \begin{pmatrix} z_{2i-1}^* \\ y_{2i-1}^* \end{pmatrix} \\ &= \begin{pmatrix} \frac{c+\frac{\mu}{\lambda}+r}{c} & -\frac{r}{c} \\ \frac{(c+\frac{\mu}{\lambda}+r)^2}{rc} - \frac{c}{r} & -\frac{c+\frac{\mu}{\lambda}+r}{c} \end{pmatrix} \begin{pmatrix} z_{2i-1}^* \\ y_{2i-1}^* \end{pmatrix} \\ &= \mathbf{Q}_r \begin{pmatrix} y_{2i-1}^* \\ z_{2i-1}^* \end{pmatrix}. \end{aligned}$$

Analogously, from (12) and (13) we deduce that for all  $1 \leq i \leq T-1$

$$\begin{pmatrix} y_{2i+1}^* \\ z_{2i+1}^* \end{pmatrix} = \mathbf{Q}_r \begin{pmatrix} z_{2i}^* \\ y_{2i}^* \end{pmatrix}.$$

**For odd  $n$ ,** the first-order optimality conditions yield

$$\left(c + \frac{M}{n} + \frac{\mu}{\lambda}\right) z_{2i-1}^* - cz_{2i}^* - \frac{M}{n} y_{2i-1}^* = 0 \quad \text{for } 1 \leq i \leq T \quad (15)$$

$$\left(c + \frac{M}{n} + \frac{\mu}{\lambda}\right) z_{2i}^* - cz_{2i-1}^* - \frac{M}{n} y_{2i}^* = 0 \quad \text{for } 1 \leq i \leq T \quad (16)$$

$$\left(\frac{M+1}{M}c + \frac{M+1}{n} + \frac{M+1}{M}\frac{\mu}{\lambda}\right) y_{2i}^* - \frac{M+1}{M}cy_{2i+1}^* - \frac{M+1}{n}z_{2i}^* = 0 \quad \text{for } 1 \leq i \leq T-1 \quad (17)$$

$$\left(\frac{M+1}{M}c + \frac{M+1}{n} + \frac{M+1}{M}\frac{\mu}{\lambda}\right) y_{2i+1}^* - \frac{M+1}{M}cy_{2i}^* - \frac{M+1}{n}z_{2i+1}^* = 0 \quad \text{for } 1 \leq i \leq T-1 \quad (18)$$

Equalities (15) and (16) can be equivalently written as

$$\begin{pmatrix} c & 0 \\ -c-r-\frac{\mu}{\lambda} & r \end{pmatrix} \begin{pmatrix} z_{2i}^* \\ y_{2i}^* \end{pmatrix} = \begin{pmatrix} c+r+\frac{\mu}{\lambda} & -r \\ -c & 0 \end{pmatrix} \begin{pmatrix} z_{2i-1}^* \\ y_{2i-1}^* \end{pmatrix} \quad \text{for } 1 \leq i \leq T,$$

which is identical to (14), and thus

$$\begin{pmatrix} z_{2i}^* \\ y_{2i}^* \end{pmatrix} = \mathbf{Q}_r \begin{pmatrix} y_{2i-1}^* \\ z_{2i-1}^* \end{pmatrix}.$$

Similarly, (17) and (18) imply that for all  $1 \leq i \leq T-1$

$$\begin{pmatrix} y_{2i+1}^* \\ z_{2i+1}^* \end{pmatrix} = \mathbf{Q}_r \begin{pmatrix} z_{2i}^* \\ y_{2i}^* \end{pmatrix}.$$

As consequence of Lemma D.1, we have that  $w_k = \mathbf{Q}_r^{k-1} w_1$  with  $\frac{1}{3} \leq r \leq \frac{1}{2}$ . Now we use the flexibility to choose  $a \in \mathbb{R}, b \in \mathbb{R}^+$ , so that we can find suitable  $w_k$  (and thus suitable  $x^*$ ). Specifically, we aim to choose  $a, b$ , so that  $w_1$  will be the eigenvector of  $\mathbf{Q}_r$ , corresponding to a suitable eigenvalue  $\gamma$  of matrix  $\mathbf{Q}_r$ . Then  $w_k$  could be written as  $w_k = \gamma^k w_1$ .

**Lemma D.2** Choose  $c := \begin{cases} 1 & \text{if } L \geq \lambda + \mu \\ \delta \frac{\mu}{\lambda}, \delta \geq 1 & \text{if } L < \lambda + \mu \end{cases}$  and

$$b := \begin{cases} \frac{\frac{\mu^2}{\lambda^2} + 2\frac{\mu}{\lambda} + 2r + 2r\frac{\mu}{\lambda} + 2r^2 + \left(\frac{\mu}{\lambda}(\frac{\mu}{\lambda} + 2r)(\frac{\mu}{\lambda} + 2)\right)^{\frac{1}{2}}}{2r(1 + \frac{\mu}{\lambda} + r)} - 1 - \frac{\mu}{\lambda} & \text{if } L \geq \lambda + \mu \\ \frac{\frac{\mu^2}{\lambda^2} + 2r^2 + 2r\frac{\mu}{\lambda} + 2\delta r\frac{\mu}{\lambda} + 2\delta\frac{\mu^2}{\lambda^2} + \frac{\mu}{\lambda}((2\delta + 1)(\frac{\mu}{\lambda} + 2r)(\frac{\mu}{\lambda} + 2r + 2\delta\frac{\mu}{\lambda}))^{\frac{1}{2}}}{2r(\frac{\mu}{\lambda} + r + \delta\frac{\mu}{\lambda})} - 1 - \frac{\mu}{\lambda} & \text{if } L < \lambda + \mu \end{cases}. \quad (19)$$

Then, we have  $b \geq 0$  and

$$w_i = \gamma^{i-1} w_1 \neq \begin{pmatrix} 0 \\ 0 \end{pmatrix} \quad \text{for } i = 1, 2, \dots, d$$

where

$$\gamma := \begin{cases} \frac{\frac{\mu^2}{\lambda^2} + 2\frac{\mu}{\lambda} + 2r + 2r\frac{\mu}{\lambda} - \left(\frac{\mu}{\lambda}(\frac{\mu}{\lambda} + 2r)(\frac{\mu}{\lambda} + 2)\right)^{\frac{1}{2}}}{2r} \geq 1 - 10\sqrt{\frac{\mu}{\lambda}} & \text{if } L \geq \lambda + \mu \\ \frac{\frac{\mu}{\lambda} + 2r + 2\delta r + 2\delta\frac{\mu}{\lambda} - \left((2\delta + 1)(\frac{\mu}{\lambda} + 2r)(\frac{\mu}{\lambda} + 2r + 2\delta\frac{\mu}{\lambda})\right)^{\frac{1}{2}}}{2\delta r} \geq 1 - 10\sqrt{\frac{1}{\delta}} & \text{if } L < \lambda + \mu \end{cases}. \quad (20)$$

**Proof:** First, note that if  $c = 1$ , each local objective is  $(\mu + \lambda)$ -smooth, and thus also  $L$ -smooth (and therefore the choice of  $c$  does not contradict the smoothness). Next, if  $L \geq \lambda + \mu$ , the vector

$$v := \begin{pmatrix} \frac{\frac{\mu^2}{\lambda^2} + 2\frac{\mu}{\lambda} + 2r + 2r\frac{\mu}{\lambda} + 2r^2 + \left(\frac{\mu}{\lambda}(\frac{\mu}{\lambda} + 2r)(\frac{\mu}{\lambda} + 2)\right)^{\frac{1}{2}}}{2r(1 + \frac{\mu}{\lambda} + r)} \\ 1 \end{pmatrix}$$

is an unnormalized eigenvector of  $\mathbf{Q}_r$  corresponding to eigenvalue  $\gamma$ .<sup>15</sup> Next, we prove  $b \geq 0$  and  $\gamma \geq 1 - 10\sqrt{\frac{\mu}{\lambda}}$  using Mathematica, see the file `proof.nb` and the screen shot below.

```
In[1]:= FindInstance[
  (2 * x + 2 * r + 2 * r * x + x ^ 2 - ((x) * (x + 2 * r) * (x + 2) * (x + 2 + 2 * r)) ^ (0.5)) / (2 * r) -
  1 + 10 * x ^ (0.5) < 0 && x > 0 && x ≤ 1 && r ≥ 1 / 3 && r ≤ 1 / 2, {x, r}]

Out[1]= {}

In[2]:= FindInstance[
  (2 * x + 2 * r + 2 * r * x + x ^ 2 + 2 * r ^ 2 + ((x) * (x + 2 * r) * (x + 2) * (x + 2 + 2 * r)) ^ (0.5)) /
  (2 * r * (1 + x + r)) - 1 - x < 0 && x > 0 && x ≤ 1 && r ≥ 1 / 3 && r ≤ 1 / 2, {x, r}]

Out[2]= {}
```

Let us look now at the case where  $L \leq \lambda + \mu$ . Now, the vector

$$v := \begin{pmatrix} \frac{\frac{\mu^2}{\lambda^2} + 2r^2 + 2r\frac{\mu}{\lambda} + 2\delta r\frac{\mu}{\lambda} + 2\delta\frac{\mu^2}{\lambda^2} + \frac{\mu}{\lambda}((2\delta + 1)(\frac{\mu}{\lambda} + 2r)(\frac{\mu}{\lambda} + 2r + 2\delta\frac{\mu}{\lambda}))^{\frac{1}{2}}}{2r(\frac{\mu}{\lambda} + r + \delta\frac{\mu}{\lambda})} \\ 1 \end{pmatrix}$$

is an unnormalized eigenvector of  $\mathbf{Q}_r$  corresponding to eigenvalue  $\gamma$ .<sup>16</sup> Next, we prove  $b \geq 0$  and  $\gamma \geq 1 - 10\sqrt{\frac{1}{\delta}}$  using Mathematica, see the file `proof.nb` and the screen shot below.

<sup>15</sup>See a MatLab symbolic verification at file `eigenvalues.m`.

<sup>16</sup>See a MatLab symbolic verification at file `eigenvalueus.m`.

```

In[12]:= FindInstance[
  (x + 2 * r + 2 * delta * r + 2 * delta * x - ((2 * delta + 1) * (x + 2 * r) * (x + 2 * r + 2 * delta * x)) ^ (0.5)) /
  (2 * delta * r) - 1 + 10 / (delta ^ (0.5)) < 0 && x > 0 && x ≤ 1 && r ≥ 1 / 3 && r ≤ 1 / 2 &&
  delta ≥ 1 && delta ≤ 1 / x, {x, r, delta}]

Out[12]= {}

In[13]:= FindInstance[
  (x ^ 2 + 2 * r ^ 2 + 2 * r * x + 2 * delta * r * x + 2 * delta * x ^ 2 + x * ((2 * delta + 1) * (x + 2 * r)
  * (x + 2) * (x + 2 * r + 2 * delta * x)) ^ (0.5)) / (2 * r * (x + r + delta * x)) - 1 - x < 0 &&
  x > 0 && x ≤ 1 && r ≥ 1 / 3 && r ≤ 1 / 2 && delta ≥ 1 && delta ≤ 1 / x, {x, r, delta}]

Out[13]= {}

```

Setting  $b$  according to (19) we assure that  $w_i$  is a multiple of  $v$  and consequently we have

$$w_i = \gamma^{i-1} w_1 \quad \text{for } i = 1, 2, \dots, d$$

as desired. It remains to mention that  $w_i \neq \begin{pmatrix} 0 \\ 0 \end{pmatrix}$  regardless of the choice of  $a \neq 0$ .

**Proof: Theorem 3.1**

Let  $x^0 = 0 \in \mathbb{R}^{nd}$ . Note that our oracle allows us at most  $K + 1$  nonzero coordinates of  $x^K$  after  $K$  rounds of communications. Consequently,

$$\begin{aligned}
\frac{\|x^K - x^*\|^2}{\|x^0 - x^*\|^2} &\geq \frac{1}{2} \frac{\sum_{j=K+2}^d \|w_j\|^2}{\sum_{j=1}^d \|w_j\|^2} = \frac{1}{2} \frac{\sum_{j=K+2}^d \gamma^{j-1} \|w_1\|^2}{\sum_{j=1}^d \gamma^{j-1} \|w_1\|^2} = \frac{1}{2} \frac{\gamma^{K+1} \sum_{j=0}^{d-K-2} \gamma^j}{\sum_{j=0}^{d-1} \gamma^j} \\
&= \frac{1}{2} \gamma^{K+1} \frac{1 - \gamma^{d-K-1}}{1 - \gamma^d} \stackrel{(*)}{\geq} \frac{1}{4} \left( 1 - 10 \max \left\{ \sqrt{\frac{\mu}{\lambda}}, \sqrt{\frac{1}{\delta}} \right\} \right)^{K+1} \\
&= \frac{1}{4} \left( 1 - 10 \max \left\{ \sqrt{\frac{\mu}{\lambda}}, \sqrt{\frac{\mu}{L - \mu}} \right\} \right)^{K+1}
\end{aligned}$$

where the inequality  $(*)$  holds for large enough  $T$  (and consequently large enough  $d = 2T$ ).  $\square$

## E Proofs for Section 4

### E.1 Towards the Proof of Theorems 4.2 and 4.3

**Proposition E.1** *Iterates of Algorithm 1 satisfy*

$$\begin{aligned} & F(x^k) - F^* \\ & \leq \left(1 - \sqrt{\frac{\mu}{\lambda}}\right)^k \left( \sqrt{2(F(x^0) - F^*)} + 2\sqrt{\frac{\lambda}{\mu}} \left( \sum_{i=1}^k \epsilon_i^{\frac{1}{2}} \left(1 - \sqrt{\frac{\mu}{\lambda}}\right)^{-\frac{i}{2}} \right) + \sqrt{\sum_{i=1}^k \epsilon_i \left(1 - \sqrt{\frac{\mu}{\lambda}}\right)^{-i}} \right)^2. \end{aligned} \quad (21)$$

**Proof:** First, notice that the objective is  $\frac{\lambda}{n}$  smooth and  $\frac{\mu}{n}$ -strongly convex. Next, the error in the evaluation of the proximal operator at iteration  $k$  can be expressed as

$$\sum_{i=1}^n \frac{1}{n} f_i(x_i^{k+1}) + \frac{\lambda}{2n} \|x_i^{k+1} - y^k\|^2 \leq \sum_{i=1}^n \frac{1}{n} \epsilon_k = \epsilon_k.$$

It remains to apply Proposition 4 from [45].

#### E.1.1 General convergence rate of IAPGD

Theorem E.2 shows that the expected number of communications that Algorithm 1 requires to reach  $\varepsilon$ -approximate solution is  $\tilde{\mathcal{O}}\left(\sqrt{\frac{\lambda}{\mu}}\right)$ , given that (22) holds.

**Theorem E.2** *Assume that for all  $k \geq 0, 1 \leq i \leq n$ , the subproblem (7) was solved up to a suboptimality<sup>17</sup>  $\epsilon_k$  by a possibly randomized iterative algorithm such that*

$$\mathbb{E}[\epsilon_k \mid x^k] \leq \left(1 - \sqrt{\frac{\mu}{\lambda}}\right)^{2k} R^2 \quad (22)$$

for some fixed  $R > 0$ . Consequently, we have

$$\mathbb{E}\left[(F(x^k) - F^*)^{\frac{1}{2}}\right] \leq \left(1 - \sqrt{\frac{\mu}{\lambda}}\right)^{\frac{k}{2}} \left( \sqrt{2(F(x^0) - F^*)} + 2\left(2\sqrt{\frac{\lambda}{\mu}} + 1\right) \sqrt{\frac{\lambda}{\mu}} R \right). \quad (23)$$

**Proof:**

Let  $\omega := 1 - \sqrt{\frac{\mu}{\lambda}}$ . Proposition E.1 gives us

$$\begin{aligned} (F(x^k) - F^*)^{\frac{1}{2}} & \stackrel{(21)}{\leq} \omega^{\frac{k}{2}} \left( \sqrt{2(F(x^0) - F^*)} + 2\sqrt{\frac{\lambda}{\mu}} \left( \sum_{i=1}^k \epsilon_i^{\frac{1}{2}} \omega^{-\frac{i}{2}} \right) + \sqrt{\sum_{i=1}^k \epsilon_i \omega^{-i}} \right) \\ & \leq \omega^{\frac{k}{2}} \left( \sqrt{2(F(x^0) - F^*)} + \left(2\sqrt{\frac{\lambda}{\mu}} + 1\right) \left( \sum_{i=1}^k \epsilon_i^{\frac{1}{2}} \omega^{-\frac{i}{2}} \right) \right). \end{aligned}$$

Taking the expectation, we get

---

<sup>17</sup>See Algorithm 1 for the exact meaning.

$$\begin{aligned}
\mathbb{E} \left[ (F(x^k) - F^\star)^{\frac{1}{2}} \right] &\leq \omega^{\frac{k}{2}} \left( \sqrt{2(F(x^0) - F^\star)} + \left( 2\sqrt{\frac{\lambda}{\mu}} + 1 \right) \left( \sum_{i=1}^k \mathbb{E} \left[ \epsilon_i^{\frac{1}{2}} \right] \omega^{-\frac{i}{2}} \right) \right) \\
&\leq \omega^{\frac{k}{2}} \left( \sqrt{2(F(x^0) - F^\star)} + \left( 2\sqrt{\frac{\lambda}{\mu}} + 1 \right) \left( \sum_{i=1}^k \mathbb{E} [\epsilon_i]^{\frac{1}{2}} \omega^{-\frac{i}{2}} \right) \right) \\
&\stackrel{(22)}{\leq} \omega^{\frac{k}{2}} \left( \sqrt{2(F(x^0) - F^\star)} + \left( 2\sqrt{\frac{\lambda}{\mu}} + 1 \right) R \left( \sum_{i=1}^k \omega^{\frac{i}{2}} \right) \right) \\
&\leq \omega^{\frac{k}{2}} \left( \sqrt{2(F(x^0) - F^\star)} + \left( 2\sqrt{\frac{\lambda}{\mu}} + 1 \right) R \left( \sum_{i=1}^{\infty} \omega^{\frac{i}{2}} \right) \right) \\
&= \omega^{\frac{k}{2}} \left( \sqrt{2(F(x^0) - F^\star)} + \left( 2\sqrt{\frac{\lambda}{\mu}} + 1 \right) R \frac{\omega^{\frac{1}{2}}}{1 - \omega^{\frac{1}{2}}} \right) \\
&\leq \omega^{\frac{k}{2}} \left( \sqrt{2(F(x^0) - F^\star)} + \left( 2\sqrt{\frac{\lambda}{\mu}} + 1 \right) 2R \frac{1}{1 - \omega} \right) \\
&= \omega^{\frac{k}{2}} \left( \sqrt{2(F(x^0) - F^\star)} + \left( 2\sqrt{\frac{\lambda}{\mu}} + 1 \right) 2R \sqrt{\frac{\lambda}{\mu}} \right),
\end{aligned}$$

which is exactly (23).

### E.1.2 Proof of Theorem 4.2

Denote  $\mathcal{S}' := \{x; F(x) \leq F^\star + 8(F(x^0) - F^\star)\}$ ,  $\mathcal{S} := \{(2 - \alpha)x' - (1 - \alpha)x''; x', x'' \in \mathcal{S}', 0 \leq \alpha \leq 1\}$  and  $D := \text{Diam}(\mathcal{S}) < \infty$ . Consequently,

$$D^2 \leq 36 \max_{x \in \mathcal{S}} \|x - x^\star\|^2 \leq \frac{18n}{\mu} \max_{x \in \mathcal{S}} (F(x) - F(x^\star)) \leq \frac{144n}{\mu} (F(x^0) - F^\star) \quad (24)$$

Let us proceed with induction. Suppose that for all  $0 \leq t < k$  we have

$$F(x^i) - F^\star \leq 8 \left( 1 - \sqrt{\frac{\mu}{\lambda}} \right)^t (F(x^0) - F^\star).$$

Consequently,  $x^t \in \mathcal{S}'$  for all  $0 \leq t < k$ . Thanks to the update rule of sequence  $\{y\}_{t=1}^\infty$ , we must have  $y^{k-1} \in \mathcal{S}$ . Next, define  $\hat{x}_i^k := \arg\min_{z \in \mathbb{R}^d} f_i(z) + \frac{\lambda}{2n} \|z - \bar{y}^{k-1}\|^2$ . Clearly,  $\hat{x}^k \in \mathcal{S}$ , and consequently,  $\|\hat{x}^k - y^{k-1}\|^2 \leq D^2$ .

We will next show that

$$\epsilon_k \leq R^2 \omega^{2k}, \quad (25)$$

where

$$R := \frac{\sqrt{2(F(x^0) - F^\star)}}{2\sqrt{\frac{\lambda}{\mu}} \left( 2\sqrt{\frac{\lambda}{\mu}} + 1 \right)}, \quad \omega := 1 - \sqrt{\frac{\mu}{\lambda}}. \quad (26)$$



Define  $h_i^k(z) := f_i(z) + \frac{\lambda}{2n}\|z - \bar{y}^{k-1}\|^2$ . Since  $h_i^k$  is  $\frac{1}{n}(L + \lambda)$  smooth and  $\frac{1}{n}(\mu + \lambda)$  strongly convex, running AGD locally for  $c_1 + c_2 k$  iterations with<sup>18</sup>

$$\begin{aligned} c_1 &:= -\frac{\log \frac{4LD^2}{R^2}}{\log \left(1 - \sqrt{\frac{\mu+\lambda}{L+\lambda}}\right)} \stackrel{(*)}{\leq} \sqrt{\frac{L+\lambda}{\mu+\lambda}} \log \frac{4LD^2}{R^2} \stackrel{(24)}{\leq} \sqrt{\frac{L+\lambda}{\mu+\lambda}} \log \frac{1152L\lambda n \left(2\sqrt{\frac{\lambda}{\mu}} + 1\right)^2}{\mu^2}, \\ c_2 &:= \frac{2 \log \omega}{\log \left(1 - \sqrt{\frac{\mu+\lambda}{L+\lambda}}\right)} \stackrel{(*)+(**)}{\leq} 4\sqrt{\frac{\mu(L+\lambda)}{\lambda(\mu+\lambda)}} \end{aligned}$$

yields

$$\begin{aligned} \epsilon_k &\stackrel{[45], \text{Prop 4}}{\leq} \left(1 - \sqrt{\frac{\mu+\lambda}{L+\lambda}}\right)^{c_1+c_2k} 4 \left(\sum_{i=1}^n (h_i^k(y_i^{k-1}) - h_i^k(\hat{x}_i^k))\right) \\ &\leq \left(1 - \sqrt{\frac{\mu+\lambda}{L+\lambda}}\right)^{c_1+c_2k} 4LD^2 \\ &= \exp \left( c_2 k \log \left(1 - \sqrt{\frac{\mu+\lambda}{L+\lambda}}\right) + c_1 \log \left(1 - \sqrt{\frac{\mu+\lambda}{L+\lambda}}\right) + \log(4LD^2) \right) \\ &= \exp(2k \log \omega + \log(R^2)) \\ &= R^2 \omega^{2k} \end{aligned}$$

as desired.

Next, Theorem E.2 gives us

$$\begin{aligned} F(x^k) - F^* &\stackrel{(23)}{\leq} \left(1 - \sqrt{\frac{\mu}{\lambda}}\right)^k \left( \sqrt{2(F(x^0) - F^*)} + 2 \left(2\sqrt{\frac{\lambda}{\mu}} + 1\right) \sqrt{\frac{\lambda}{\mu}} R \right)^2 \\ &\stackrel{(26)}{=} 8 \left(1 - \sqrt{\frac{\mu}{\lambda}}\right)^k (F(x^0) - F^*), \end{aligned}$$

as desired.

Consequently, in order to reach  $\varepsilon$  suboptimality, we shall set  $k = \mathcal{O}\left(\sqrt{\frac{\lambda}{\mu}} \log \frac{1}{\varepsilon}\right)$ . The total number of local gradient computation thus is

$$\begin{aligned} \sum_{i=1}^k (c_1 + c_2 i) &= kc_1 + c_2 \mathcal{O}(k^2) \\ &= \mathcal{O} \left( \sqrt{\frac{L+\lambda}{\mu+\lambda}} \log \frac{32L\lambda n^2 \left(4\sqrt{\frac{\lambda}{\mu}} + 1\right)^2}{\mu^2} \sqrt{\frac{\lambda}{\mu}} \log \frac{1}{\varepsilon} + \sqrt{\frac{\mu(L+\lambda)}{\lambda(\mu+\lambda)}} \frac{\lambda}{\mu} \left(\log \frac{1}{\varepsilon}\right)^2 \right) \\ &= \mathcal{O} \left( \sqrt{\frac{L+\lambda}{\mu}} \log \frac{1}{\varepsilon} \left( \log \frac{L\lambda n}{\mu} + \log \frac{1}{\varepsilon} \right) \right). \end{aligned}$$

□

---

<sup>18</sup>Inequality  $(*)$  holds since for any  $0 \leq a < 1$  we have  $\frac{-1}{\log(1-a)} \leq \frac{1}{a}$ , while  $(**)$  holds since  $\log \left( \frac{1}{1-\sqrt{\frac{\mu}{\lambda}}} \right) \leq 2\sqrt{\frac{\mu}{\lambda}}$  thanks to  $\lambda \geq 2\mu$ .

### E.1.3 Proof of Theorem 4.3

Next, since the sequence of iterates  $\{x^k\}_{k=0}^\infty$  is bounded, so is the sequence  $\{y^k\}_{k=0}^\infty$ , and consequently, the initial distance to the optimum is bounded for each local subproblem too. As the local objective is  $(\tilde{L} + \lambda)$ -smooth and  $(\mu + \lambda)$ -strongly convex, in order to guarantee (22), Katyusha requires

$$\begin{aligned} \mathcal{O} \left( \left( m + \sqrt{m \frac{\tilde{L} + \lambda}{\mu + \lambda}} \right) \log \frac{1}{R^2 \omega^2 k} \right) &= \mathcal{O} \left( \left( m + \sqrt{m \frac{\tilde{L} + \lambda}{\mu + \lambda}} \right) \left( \log \frac{1}{R^2} + 2k \log \frac{1}{\omega} \right) \right) \\ &\stackrel{(***)}{=} \mathcal{O} \left( \left( m + \sqrt{m \frac{\tilde{L} + \lambda}{\mu + \lambda}} \right) \left( \log \frac{1}{R^2} + k \sqrt{\frac{\mu}{\lambda}} \right) \right) \end{aligned}$$

iterations.<sup>19</sup>

Lastly, since Katyusha requires  $\mathcal{O}(1)$  local stochastic gradient evaluations on average, the total local gradient complexity becomes

$$\sum_{t=1}^{\tilde{\mathcal{O}}\left(\sqrt{\frac{\lambda}{\mu}}\right)} \mathcal{O} \left( \left( m + \sqrt{m \frac{\tilde{L} + \lambda}{\mu + \lambda}} \right) \left( \log \frac{1}{R^2} + t \sqrt{\frac{\mu}{\lambda}} \right) \right) = \tilde{\mathcal{O}} \left( \left( m \sqrt{\frac{\lambda}{\mu}} + \sqrt{m \frac{\tilde{L} + \lambda}{\mu}} \right) \right).$$

□

## E.2 Towards the Proof of Theorem 4.4

**Lemma E.3** *Suppose that  $\tilde{f}_{ij}$  is  $\tilde{L}$  smooth for all  $1 \leq i \leq n, 1 \leq j \leq m$ . Let  $g^k$  be a variance reduced stochastic gradient estimator from Algorithm 4 and define*

$$\mathcal{L} := \max \left\{ \frac{\tilde{L}}{n(1-p)}, \frac{\lambda}{np} \right\}.$$

Then, we have

$$\mathbb{E} \left[ \|g^k - \nabla F(x^k)\|^2 \right] \leq 2\mathcal{L} D_F(w^k, x^k). \quad (27)$$

**Proof:**

---

<sup>19</sup>Inequality  $(***)$  holds since  $\log \left( \frac{1}{1 - \sqrt{\frac{\mu}{\lambda}}} \right) \leq 2\sqrt{\frac{\mu}{\lambda}}$  thanks to  $\lambda \geq 2\mu$ .

$$\begin{aligned}
\mathbb{E} \left[ \|g^k - \nabla F(x^k)\|^2 \right] &= \frac{1-p}{m} \sum_{j=1}^m \sum_{i=1}^n \left\| \frac{1}{1-p} \left( \nabla \tilde{f}_{ij}(x^k) - \nabla \tilde{f}_{ij}(w^k) \right) - (\nabla F(x^k) - \nabla F(w^k)) \right\|^2 \\
&\quad + p \left\| \frac{\lambda}{p} (\nabla \psi(x^k) - \nabla \psi(w^k)) - (\nabla F(x^k) - \nabla F(w^k)) \right\|^2 \\
&\leq \frac{1-p}{m} \sum_{j=1}^m \sum_{i=1}^n \left\| \frac{1}{1-p} \left( \nabla \tilde{f}_{ij}(x^k) - \nabla \tilde{f}_{ij}(w^k) \right) \right\|^2 \\
&\quad + p \left\| \frac{\lambda}{p} (\nabla \psi(x^k) - \nabla \psi(w^k)) \right\|^2 \\
&= \frac{1}{m(1-p)} \sum_{j=1}^m \sum_{i=1}^n \left\| \nabla \tilde{f}_{ij}(x^k) - \nabla \tilde{f}_{ij}(w^k) \right\|^2 + \frac{\lambda^2}{p} \left\| (\nabla \psi(x^k) - \nabla \psi(w^k)) \right\|^2 \\
&\stackrel{(*)}{\leq} \frac{2\tilde{L}}{nm(1-p)} \sum_{j=1}^m \sum_{i=1}^n D_{\tilde{f}_{ij}}(w^k, x^k) + \frac{2\lambda^2}{np} D_{\psi}(w^k, x^k) \\
&= \frac{2\tilde{L}}{1-p} D_f(w^k, x^k) + \frac{2\lambda^2}{np} D_{\psi}(w^k, x^k) \\
&\leq 2 \max \left\{ \frac{\tilde{L}}{n(1-p)}, \frac{\lambda}{np} \right\} D_F(w^k, x^k) \\
&= 2\mathcal{L} D_F(w^k, x^k).
\end{aligned}$$

Above,  $(*)$  holds since  $\tilde{f}$  is  $\frac{L}{n}$  smooth and  $\psi$  is  $\frac{1}{n}$  smooth [19].

**Proposition E.4** *Let  $\tilde{f}_{ij}$  be  $L$  smooth and  $\mu$  strongly convex for all  $1 \leq i \leq n, 1 \leq j \leq m$ . Define the following Lyapunov function:*

$$\Psi^k := \|z^k - x^*\|^2 + \frac{2\gamma\beta}{\theta_1} [F(y^k) - F(x^*)] + \frac{(2\theta_2 + \theta_1)\gamma\beta}{\theta_1\rho} [F(w^k) - F(x^*)],$$

and let

$$\begin{aligned}
L_F &= \frac{1}{n}(\lambda + \tilde{L}), \\
\eta &= \frac{1}{4} \max\{L_F, \mathcal{L}\}^{-1}, \\
\theta_2 &= \frac{\mathcal{L}}{2 \max\{L_F, \mathcal{L}\}}, \\
\gamma &= \frac{1}{\max\{2\mu/n, 4\theta_1/\eta\}}, \\
\beta &= 1 - \frac{\gamma\mu}{n} \text{ and} \\
\theta_1 &= \min \left\{ \frac{1}{2}, \sqrt{\frac{\eta\mu}{n} \max \left\{ \frac{1}{2}, \frac{\theta_2}{\rho} \right\}} \right\}.
\end{aligned}$$

Then the following inequality holds:

$$\mathbb{E} [\Psi^{k+1}] \leq \left[ 1 - \frac{1}{4} \min \left\{ \rho, \sqrt{\frac{\mu}{2n \max \left\{ L_F, \frac{\mathcal{L}}{\rho} \right\}}} \right\} \right] \Psi^0.$$

As a consequence, iteration complexity of Algorithm 4 is

$$\mathcal{O} \left( \left( \frac{1}{\rho} + \sqrt{\frac{\max \left\{ \frac{\tilde{L}}{1-p}, \frac{\lambda}{p} \right\}}{\rho\mu}} \right) \log \frac{1}{\varepsilon} \right).$$

At the same time, the communication complexity of AL2SGD+ is

$$\mathcal{O} \left( (\rho + p(1-p)) \left( \frac{1}{\rho} + \sqrt{\frac{\max \left\{ \frac{\tilde{L}}{1-p}, \frac{\lambda}{p} \right\}}{\rho\mu}} \right) \log \frac{1}{\varepsilon} \right)$$

and the local stochastic gradient complexity is

$$\mathcal{O} \left( (\rho m + (1-\rho)) \left( \frac{1}{\rho} + \sqrt{\frac{\max \left\{ \frac{\tilde{L}}{1-p}, \frac{\lambda}{p} \right\}}{\rho\mu}} \right) \log \frac{1}{\varepsilon} \right).$$

**Proof:**

Note that AL2SGD+ is a special case of L-Katyusha from [18].<sup>20</sup> In order to apply Theorem 4.1 therein directly, it suffices to notice that function  $F$  is  $L_F = \frac{1}{n}(\lambda + \tilde{L})$  smooth and  $\frac{1}{n}\mu$  strongly convex, and at the same time, thanks to Lemma E.3 we have

$$\mathbb{E} \left[ \|g^k - \nabla F(x^k)\|^2 \right] \leq 2\mathcal{L}D_F(w^k, x^k).$$

Consequently, we immediately get the iteration complexity. The local stochastic gradient complexity of a single iteration of AL2SGD+ is 0 if  $\xi = 1, \xi' = 0$ , 1 if  $\xi = 0, \xi' = 0$ ,  $m$  if  $\xi = 0, \xi' = 1$  and  $m + 1$  if  $\xi = 1, \xi' = 1$ . Thus, the total expected local stochastic gradient complexity is bounded by

$$\mathcal{O} \left( (\rho m + (1-\rho)) \left( \frac{1}{\rho} + \sqrt{\frac{\max \left\{ \frac{\tilde{L}}{1-p}, \frac{\lambda}{p} \right\}}{\rho\mu}} \right) \log \frac{1}{\varepsilon} \right)$$

as desired. Next, the total communication complexity is bounded by the sum of the communication complexities coming from the full gradient computation (if statement that includes  $\xi$ ) and the rest (if statement that includes  $\xi'$ ). The former requires a communication if  $\xi' = 1$ , the latter if two consecutive  $\xi$ -coin flips are different (see [19]), yielding the expected total communication  $\mathcal{O}(\rho + p(1-p))$  per iteration.

### E.2.1 Proof of Theorem 4.4

For  $\rho = p(1-p)$  and  $p = \frac{\lambda}{\lambda + \tilde{L}}$ , the total communication complexity of AL2SGD+ becomes

$$\begin{aligned} \mathcal{O} \left( (\rho + p(1-p)) \left( \frac{1}{\rho} + \sqrt{\frac{\max \left\{ \frac{\tilde{L}}{1-p}, \frac{\lambda}{p} \right\}}{\rho\mu}} \right) \log \frac{1}{\varepsilon} \right) &= \mathcal{O} \left( \sqrt{\frac{p\tilde{L} + (1-p)\lambda}{\mu}} \log \frac{1}{\varepsilon} \right) \\ &= \mathcal{O} \left( \sqrt{\frac{\tilde{L}\lambda}{(\tilde{L} + \lambda)\mu}} \log \frac{1}{\varepsilon} \right) \\ &= \mathcal{O} \left( \sqrt{\frac{\min\{\tilde{L}, \lambda\}}{\mu}} \log \frac{1}{\varepsilon} \right) \end{aligned}$$

as desired.

<sup>20</sup> Similarly, we could have applied different accelerated variance reduced method with importance sampling such as another version of L-Katyusha [42], for example.

The local stochastic gradient complexity for  $p = \frac{\lambda}{\lambda + \tilde{L}}$  and  $\rho = \frac{1}{m}$  is

$$\begin{aligned} & \mathcal{O} \left( (\rho m + (1 - \rho)) \left( \frac{1}{\rho} + \sqrt{\frac{\max \left\{ \frac{\tilde{L}}{1-p}, \frac{\lambda}{p} \right\}}{\rho \mu}} \right) \log \frac{1}{\varepsilon} \right) \\ &= \mathcal{O} \left( \left( m + \sqrt{\frac{m(\tilde{L} + \lambda)}{\mu}} \right) \log \frac{1}{\varepsilon} \right). \end{aligned}$$

□

## F Related work on the lower complexity bounds

**Related literature on the lower complexity bounds.** We distinguish two main lines of work on the lower complexity bounds related to our paper besides already mentioned works [44, 21].

The first direction focuses on the classical worst-case bounds for sequential optimization developed by Nemirovsky and Yudin [35]. Their lower bound was further studied in [2, 43, 39] using information theory. The nearly-tight lower bounds for deterministic non-Euclidean smooth convex functions were obtained in [17]. A significant gap between the oracle complexities of deterministic and randomized algorithms for the finite-sum problem was shown in [51], improving upon prior works [1, 27].

The second stream of work tries to answer how much a parallelism might improve upon a given oracle. This direction was, to best of our knowledge, first explored by the work of Nemirovski [34] and gained a lots of traction decently [47, 4, 52, 12, 11] motivated by an increased interest in the applications in federated learning, local differential privacy, and adaptive data analysis.

**Remark F.1** *Concurrently with our work, a different variant of accelerated FedProx—FedSplit—was proposed in [40]. There are several key differences between our work: i) While Algorithm 1 is designed to tackle the problem (2), FedSplit is designed to tackle (1). ii) The paper [40] does not argue about optimality of FedSplit, while we do and iii) Iteration/communication complexity of FedSplit is  $\mathcal{O} \left( \sqrt{\frac{L}{\mu}} \log \frac{1}{\varepsilon} \right)$  under  $L$  smoothness of  $f_1, \dots, f_n$ ; such a rate can be achieved by a direct application of AGD. At the same time, AGD does not require solving the local subproblem each iteration, thus is better in this regard. However FedSplit is a local algorithm to solve (1) with the correct fixed point, unlike other popular local algorithms.*
